1 **Natural strain variation reveals diverse biofilm regulation in squid-colonizing *Vibrio***  
2 ***fischeri***

3  
4  
5 Ella R. Rotman<sup>1,†</sup>, Katherine M. Bultman<sup>2,†</sup>, John F. Brooks II<sup>1,4</sup>, Mattias C. Gyllborg<sup>1</sup>, Hector L.  
6 Burgos<sup>2</sup>, Michael S. Wollenberg<sup>3</sup>, Mark J. Mandel<sup>1,2,\*</sup>

7  
8  
9 <sup>1</sup> Department of Microbiology-Immunology, Northwestern University Feinberg School of  
10 Medicine, Chicago, IL USA

11  
12 <sup>2</sup> Department of Medical Microbiology and Immunology, University of Wisconsin-Madison,  
13 Madison, WI USA

14  
15 <sup>3</sup> Department of Biology, Kalamazoo College, Kalamazoo, MI USA

16  
17 <sup>4</sup> Current address: Department of Immunology, The University of Texas Southwestern Medical  
18 Center, Dallas, TX USA

19  
20 † Authors contributed equally

21  
22  
23 Short title: *Vibrio fischeri* biofilm regulatory evolution

24  
25 Keywords: Biofilm, phosphorelay, RscS, BinK, *Vibrio fischeri*, *Aliivibrio fischeri*

26  
27  
28 \* Correspondence to:

29  
30 Mark J. Mandel  
31 University of Wisconsin-Madison  
32 Department of Medical Microbiology and Immunology  
33 1550 Linden Drive  
34 Madison, WI 53706  
35 Phone: (608) 261-1170  
36 Fax: (608) 262-8418  
37 Email: mmandel@wisc.edu

38  
39  
40  
41  
42

43 **ABSTRACT**

44

45 The mutualistic symbiont *Vibrio fischeri* builds a symbiotic biofilm during colonization of squid  
46 hosts. Regulation of the exopolysaccharide component, termed Syp, has been examined in  
47 strain ES114, where production is controlled by a phosphorelay that includes the inner  
48 membrane hybrid histidine kinase RscS. Most strains that lack RscS or encode divergent RscS  
49 proteins cannot colonize a squid host unless RscS from a squid symbiont is heterologously  
50 expressed. In this study, we examine *V. fischeri* isolates worldwide to understand the landscape  
51 of biofilm regulation during beneficial colonization. We provide a detailed study of three distinct  
52 evolutionary groups of *V. fischeri* and find that while the RscS-Syp biofilm pathway is required in  
53 one of the groups, two other groups of squid symbionts require Syp independent of RscS.  
54 Mediterranean squid symbionts, including *V. fischeri* SR5, colonize without an RscS homolog  
55 encoded in their genome. Additionally, Group A *V. fischeri* strains, which form a tightly-related  
56 clade of Hawaii isolates, have a frameshift in *rscS* and do not require the gene for squid  
57 colonization or competitive fitness. These same strains have a frameshift in *sypE*, and we  
58 provide evidence that this Group A *sypE* allele leads to an upregulation in biofilm activity. This  
59 work thus describes the central importance of Syp biofilm in colonization of diverse isolates, and  
60 demonstrates that significant evolutionary transitions correspond to regulatory changes in the  
61 *syp* pathway.

62

63 **IMPORTANCE**

64

65 Biofilms are surface-associated, matrix-encased bacterial aggregates that exhibit enhanced  
66 protection to antimicrobial agents. Previous work has established the importance of biofilm  
67 formation by a strain of luminous *Vibrio fischeri* bacteria as the bacteria colonize their host, the  
68 Hawaiian bobtail squid. In this study, expansion of this work to many natural isolates revealed

69 that biofilm genes are universally required, yet there has been a shuffling of the regulators of  
70 those genes. This work provides evidence that even when bacterial behaviors are conserved,  
71 dynamic regulation of those behaviors can underlie evolution of the host colonization  
72 phenotype. Furthermore, this work emphasizes the importance of investigating natural diversity  
73 as we seek to understand molecular mechanisms in bacteria.

74

## 75 INTRODUCTION

76

77 A fundamental question in studying host-associated bacterial communities is understanding how  
78 specific microbial taxa assemble reproducibly in their host. Key insights into these processes  
79 were first obtained by studying plant-associated microbes, and the discovery and  
80 characterization of Nod factors in Rhizobia was valuable to understand how partner choice  
81 between microbe and host could be mediated at the molecular level (1, 2). There are complex  
82 communities in humans and other vertebrate animals, yet metagenomic and imaging analyses  
83 of these communities have revealed striking reproducibility in the taxa present and in the spatial  
84 arrangement of those taxa (3–5). Invertebrate animal microbiomes provide appealing systems in  
85 which to study microbiome assembly in an animal host: the number of taxa are relatively small,  
86 and examination and manipulation of these organisms have yielded abundant information about  
87 processes underlying host colonization (6). For this work we focused on the binary symbiosis  
88 between *Vibrio fischeri* and bobtail squids, including the Hawaiian bobtail squid, *Euprymna*  
89 *scolopes*. Bobtail squid have an organ for the symbiont termed the light organ, and passage of  
90 specific molecules between the newly-hatched host and the symbiont leads to light organ  
91 colonization specifically by planktonic *V. fischeri* and not by other bacteria (7–9). The  
92 colonization process involves initiation, accommodation, and persistence steps, resulting in light  
93 organ crypt colonization by *V. fischeri*. Upon colonization of the squid light organ, bacteria  
94 accumulate to high density and produce light. The bacterial light is modulated by the host to

95 camouflage the moonlight shadow produced by the nighttime foraging squid in a cloaking  
96 process termed counter-illumination (10, 11). A diel rhythm leads to a daily clearing of 90-95%  
97 of the bacteria from the crypts and regrowth of the remaining cells (12). However, the initial  
98 colonization process, including biofilm-based aggregation on the host ciliated appendages,  
99 occurs only in newly-hatched squid. This work examines regulation of biofilm formation in  
100 diverse squid-colonizing *V. fischeri* strains.

101  
102 In the well-studied *V. fischeri* strain ES114, biofilm formation is required to gain entry into the  
103 squid host. RscS is a hybrid histidine kinase that regulates *V. fischeri* biofilm formation through  
104 a phosphorelay involving the hybrid histidine kinase SypF and the response regulator and  $\sigma^{54}$ -  
105 dependent activator SypG (13–15). This pathway regulates transcription of the symbiosis  
106 polysaccharide (*Syp*) locus, which encodes regulatory proteins (*SypA*, *SypE*, *SypF*, and *SypG*),  
107 glycosyltransferases, factors involved in polysaccharide export, and other biofilm-associated  
108 factors (14, 16). The products of the ES114 *syp* locus direct synthesis and export of a biofilm  
109 exopolysaccharide that is critical for colonization. Additional pathways have been identified to  
110 influence biofilm regulation in ES114, including the *SypE-SypA* pathway and inhibition of biofilm  
111 formation by *BinK* and *HahK* (17–21).

112  
113 *V. fischeri* biofilm regulation is connected to host colonization specificity. In the Pacific Ocean,  
114 the presence of *rscS* DNA is strongly correlated to the ability to colonize squid (22). As one  
115 example, while the fish symbiont MJ11 encodes a complete *syp* locus, it lacks *RscS* and does  
116 not robustly colonize squid. Heterologous expression of ES114 *RscS* in MJ11 activates the  
117 biofilm pathway and is sufficient to enable squid colonization (22). Similarly, addition of ES114  
118 *RscS* to *mjapo.8.1*--a fish symbiont that encodes a divergent *RscS* that is not functional for  
119 squid colonization--allows the strain to colonize squid (22). *RscS* has also been shown to be  
120 necessary for squid colonization in certain strains. In addition to ES114, interruption of *rscS* in

121 *V. fischeri* strains KB1A97 and MJ12 renders them unable to colonize squid. Previous  
122 phylogenetic analysis revealed that ancestral *V. fischeri* do not encode *rscS*, and that it was  
123 acquired once during the organism's evolution, likely allowing for an expansion in host range.  
124 From this analysis, it was concluded that strains with *rscS* can colonize squid, with the only  
125 exception being the fish symbionts that harbor the divergent RscS, including *mjapo.8.1* (22).  
126  
127 There are similar *Vibrio*-squid associations worldwide, yet only *V. fischeri* and the closely-  
128 related *Vibrio logei* have been isolated from light organs (23–26). Our 2009 study revealed that  
129 although most symbionts have *rscS* DNA, there are Mediterranean *V. fischeri* (e.g., SR5) that  
130 do not have *rscS* yet can colonize squid (22, 24, 27). This unexpected finding prompted the  
131 current work to examine whether strains such as SR5 colonize with the known biofilm pathway  
132 or with a novel pathway. Here, we show that all *V. fischeri* strains tested require the *syp* locus to  
133 colonize a squid host, and we identify two groups of isolates that colonize with novel regulation.  
134 Given the exquisite specificity by which *V. fischeri* bacteria colonize squid hosts, this work  
135 reinforces the importance of biofilm formation and reveals different regulatory modes across the  
136 evolutionary tree.

137

## 138 **RESULTS**

139

140 **Most *V. fischeri* strains synthesize biofilm in response to RscS overexpression.** Biofilm  
141 formation is required for squid colonization, and overexpression of the biofilm regulator RscS in  
142 strain ES114 stimulates a colony biofilm on agar plates (15). Our previous work demonstrated  
143 that *V. fischeri* strain MJ11 synthesizes a colony biofilm under similar inducing conditions, which  
144 is notable because MJ11 does not encode RscS in its chromosome (22). While the ancestral  
145 strain MJ11 did not encode RscS, it had what seemed to be an intact *syp* locus, and  
146 overexpression of the heterologous RscS from ES114 was sufficient to enable robust squid

147 colonization (22). We examined a phylogenetic tree of *V. fischeri* isolates (Fig. 1), and in this  
148 study we expand our analysis of RscS-Syp biofilm regulation in a wider group of *V. fischeri*  
149 strains.

150  
151 Initially, we asked whether responsiveness to RscS overexpression would yield a similar colony  
152 biofilm in this diverse group of strains. We took the same approach as our previous study and  
153 introduced plasmid pKG11, which overexpressed ES114 RscS, into strains across the  
154 evolutionary tree (22, 28). We observed that almost all strains tested, including those that lack  
155 *rscS*, were responsive to overexpression of ES114 RscS (Fig. 2). The morphology of the colony  
156 biofilms differed across isolates; but in most cases colony biofilm was evident at 24 h and  
157 prominent at 48 h. All of the strains exhibited some wrinkled colony morphology at 48 h with the  
158 exception of CG101, which was isolated from the pineapplefish *Cleidopus gloriamaris* (25).  
159 These results demonstrated that most *V. fischeri* strains can produce biofilm in response to  
160 RscS overexpression, and this includes strains that presumably have not encountered *rscS* in  
161 their evolutionary history.

162  
163 One unexpected observation was that there was a subset of *rscS*-encoding strains that were  
164 reproducibly delayed in their colony biofilm, and had only a mild wrinkled colony phenotype at  
165 48 h (strains MB11B1, ES213, KB2B1; Fig. 2). We considered whether this was due to  
166 differential growth of the strains, but resuspension of spots and dilution plating to determine  
167 CFU/spot demonstrated no significant growth difference between these strains and ES114  
168 under these conditions. The strains are closely-related (Fig. 1) and a previous study had noted  
169 that this group shared a number of phenotypic characteristics, e.g. reduced motility in soft agar  
170 (29). Those authors termed this tight clade as “Group A” *V. fischeri* (30). Our results in Figure 2  
171 argue that Group A strains do not respond to RscS in the same manner as other *V. fischeri*  
172 strains, which prompted us to investigate the evolution of the RscS-Syp signaling pathway. We

173 have maintained the Group A nomenclature here, and furthermore we introduce the  
174 nomenclature of Group B (a paraphyletic group of strains that contain *rscS*; this group includes  
175 the common ancestor of all *rscS*-containing strains) and Group C (a paraphyletic group of  
176 strains that contains the common ancestor of all *V. fischeri* - these strains do not contain *rscS* ),  
177 as shown in Figure 1.

178

179 **Ancestral Group C squid isolates colonize *E. scolopes* independent of RscS and**

180 **dependent on Syp.** Group C strains generally cannot colonize squid, yet there are

181 Mediterranean squid isolates that appear in this group (Fig. 1; (22)). The best-studied of these  
182 strains, SR5, was isolated from *Sepioloa robusta*, is highly luminous, and colonizes the Hawaiian  
183 bobtail squid *E. scolopes* (24). Nonetheless, this strain lacks *rscS* (27). We first asked whether  
184 the strain can colonize in our laboratory conditions, and we confirmed that it colonizes robustly,  
185 consistent with the result result previously published by Fidopiastis et al. (24) (Fig. 3). Next, we  
186 asked whether it uses the Syp biofilm to colonize. To address this question, we deleted the 18  
187 kb *syp* locus (i.e., *sypA* through *sypR*) in strains SR5 and ES114. Deletion of *rscS* or the *syp*  
188 locus in ES114 led to a substantial defect in colonization, consistent with a known role for these  
189 factors (Fig. 3). Similarly, deletion of the *syp* locus in SR5, a strain that does not encode *rscS*,  
190 led to a dramatic reduction in colonization (Fig. 3). Therefore, even though strain SR5 does not  
191 encode *rscS*, it can colonize squid, and it requires the *syp* locus to colonize normally.

192

193 **RscS is dispensable for colonization in Group A strains.** We noted in the wrinkled colony  
194 biofilm assays shown in Figure 2 that Group A strains exhibited a more modest response to  
195 overexpression of RscS. Sequencing of the native *rscS* gene in these strains revealed a  
196 predicted -1 frameshift ( $\Delta A1141$ ) between the PAS domain and the histidine kinase CA domain.  
197 Whereas ES114 and other Group B strains have nine adenines at this position, the Group A  
198 strains have eight, leading to a frameshift and then truncation at an amber stop codon, raising

199 the possibility that Group A strains have a divergent biofilm signaling pathway (Fig. 4A). Given  
200 the importance of RscS in the Group B strains including ES114, we considered the possibility  
201 that this apparent frameshift encoded a functional protein, either through ribosomal  
202 frameshifting or through the production of two polypeptides that together provided RscS  
203 function; there is precedent for both of these concepts in the literature (31, 32). We first  
204 introduced a comparable frameshift into a plasmid-borne overexpression allele of ES114 *rscS*,  
205 and this allele did not function with the deletion of the single adenine (Fig. 4B). This result  
206 suggested to us that the frameshift in the Group A strains may not be functional. Therefore, we  
207 proceeded to delete *rscS* in two Group A strains (MB11B1, ES213) and two Group B strains  
208 (ES114, MB15A4). The Group B strains required RscS for squid colonization (Fig. 5A).  
209 However, the Group A strains exhibited no deficit in the absence of *rscS* (Fig. 5A). We next  
210 attempted a more sensitive assay in which a Group A strain was competed against MB15A4.  
211 Previous studies have demonstrated that in many cases Group A strains outcompete Group B  
212 strains (30, 33). We competed Group A strain MB11B1 against Group B strain MB15A4 and  
213 observed a significant competitive advantage for the Group A strain, as was observed  
214 previously (30). Deletion of *rscS* in the Group A strain did not affect competitive fitness,  
215 demonstrating that MB11B1 can outcompete a Group B strain even if MB11B1 lacks RscS (Fig.  
216 5B).

217

218 **The *syp* locus is broadly required for squid colonization.** Given that Group A strains  
219 seemed to represent a tight phylogenetic group in which RscS was not required for colonization  
220 or competitive fitness, we next asked whether this group requires the Syp biofilm for  
221 colonization. We proceeded to delete the entire *syp* locus in two Group A and two Group B  
222 strains and to conduct single-strain colonization analysis. In each strain assayed, the *syp* locus  
223 was required for full colonization, and we observed a 2-4 log reduction in CFU per animal in the  
224 absence of the *syp* genes, pointing to a critical role for Syp biofilm in these strains (Fig. 6). In



225 Group A strains in particular, no colonization was detected in the absence of the *syp* locus.  
226 Additionally, we isolated a transposon insertion in SR5 *sypJ*, and this strain did not colonize  
227 squid well, arguing that this effect is due to the Syp biofilm and not due to regulation of a distinct  
228 phenotype by regulators within the locus.

229

230 **Group A strains encode an alternate allele of SypE.** It seemed curious to us that Group A  
231 strains do not encode a functional RscS and do not require *rscS* for colonization, yet in many  
232 cases Group A strains can outcompete Group B strains (e.g. MB11B1 in Fig. 5B; and Refs. (30,  
233 33)). We reasoned that if the Syp biofilm had a different regulatory architecture in Group A  
234 strains--e.g., constitutively activated or activated by a different regulatory protein--then this could  
235 explain the Syp regulation independent of RscS. Genome sequencing of SR5 and MB11B1 did  
236 not identify a unique histidine kinase that was likely to directly substitute for RscS (27, 33).

237 Given that the *syp* locus encodes biofilm regulatory proteins, we examined *syp* conservation.

238 We used TBLASTN with the ES114 Syp proteins as queries to determine amino acid  
239 conservation in the other *V. fischeri* Group A strain MB11B1, Group C strain SR5, and the *Vibrio*  
240 *vulnificus* type strain ATCC 27562 (34, 35). As shown in Figure 7, ES114 SypE, a response  
241 regulator and serine kinase/phosphatase that is a negative regulator of the Syp biofilm (17, 36),  
242 exhibited the lowest level of conservation among *syp* locus products. *V. vulnificus* does not  
243 encode a SypE ortholog (37), as the syntenic (but not homologous) RbdE encodes a predicted  
244 ABC transporter substrate-binding protein. The closest hit for SypE was AOT11\_RS12130 (9%  
245 identity), compared to 7% identity for the RbdE. Due to the reduced conservation at both the  
246 strain and species levels, we analyzed *V. fischeri* MB11B1 SypE in greater detail. Examination  
247 of the *sypE* coding sequence revealed an apparent -1 frameshift mutation in which the position  
248 33 (guanine in ES114 and adenine in other Group B and C strains examined) is absent in Group  
249 A strains (Fig. 7B). We therefore considered the hypothesis that SypE is nonfunctional in Group

250 A, and that these strains can colonize because they are lacking a functional copy of this  
251 negative regulator that is itself regulated by RscS.

252  
253 To test this hypothesis, we relied on knowledge of the biofilm regulatory pathway from ES114, in  
254 which overexpression of SypG produces a wrinkled colony phenotype, but only in strains lacking  
255 SypE activity (38, 39). Therefore, we introduced the SypG-overexpressing plasmid pEAH73 into  
256 strains as a measure of whether the SypE pathway was intact. In the ES114 strain background,  
257 we observed cohesive wrinkled colony formation at 48 h in an ES114  $\Delta sypE$  strain, but not in  
258 the wild-type parent (Fig. 8A). If the *sypE* frameshift observed in MB11B1 led to a loss of  
259 function, then introduction of that frameshift into ES114 would lead to a strain that is equivalent  
260 to the  $\Delta sypE$  strain. We constructed this strain and upon SypG overexpression we observed  
261 wrinkled colony formation. Surprisingly, the biofilm phenotype was observed earlier (i.e., by 24  
262 h) and leads to more defined colony biofilm architecture at 48 h. While the lack of SypE leads to  
263 increased and more rapid biofilm formation, in this assay we observed an even greater increase  
264 as a result of the frameshift in *sypE* (Fig. 8A).

265  
266 We proceeded to conduct a similar assay in the MB11B1 strain background. The colony biofilm  
267 phenotypes were muted compared to the ES114 background, but the pattern observed is the  
268 same. Strains lacking the additional nucleotide at position 33 (i.e., the native MB11B1 allele)  
269 exhibited the strongest cohesion, whereas strains with the nucleotide to mimic ES114 *sypE* (i.e.,  
270 added back in MB11B1 *sypE*(nt::33G)) were not cohesive (Fig. 8B). These results argue that a  
271 novel allele of *sypE* is found in Group A strains and this allele results in more substantial biofilm  
272 formation than in a  $\Delta sypE$  strain.

273  
274 Our finding that the MB11B1 *sypE* allele promotes biofilm formation bolstered the model that  
275 this allele contributes to the ability of MB11B1 to colonize squid independent of RscS. To test

276 this model, we introduced the frameshift into ES114 or “corrected” the frameshift in MB11B1.  
277 We then conducted single-strain colonization assays, and in each case the *sypE* allele alone  
278 was not sufficient to alter the overall colonization behavior of the strain (Fig. 9). Therefore, these  
279 data suggest that the frameshift in the MB11B1 *sypE* is not sufficient to explain its ability to  
280 colonize independent of RscS, and therefore other regions of SypE and/or other loci in the  
281 MB11B1 genome contribute to its ability to colonize independent of RscS.

282

283 **BinK is active in Group A, B, and C strains.** We recently described the histidine kinase, BinK,  
284 which negatively regulates *syp* transcription and Syp biofilm formation (18). In ES114,  
285 overexpression of BinK impairs the ability of *V. fischeri* to colonize. We therefore reasoned that  
286 if BinK could function in Group A strains and acted similarly to repress Syp biofilm, then  
287 overexpression of BinK would reduce colonization of these strains. We introduced the pBinK  
288 plasmid (i.e., ES114 *binK* (18)) and asked whether multicopy *binK* would affect colonization. In  
289 strain MB11B1, BinK overexpression led to a dramatic reduction in colonization (Fig. 10A).  
290 Therefore, there is a clear effect for BinK overexpression on the colonization of the Group A  
291 strain MB11B1.

292

293 We attempted to ask the same question in Group C strain SR5, but the pES213-origin plasmids  
294 were not retained during squid colonization. Therefore, we instead asked whether deletion of  
295 the BinK, a negative regulator of ES114 colonization, has a comparable effect in SR5 (18). We  
296 deleted *binK* and observed a 2.4-fold competitive advantage during squid competition (Fig.  
297 10B), arguing that BinK in this Group C strain is active and performs an inhibitory function  
298 similar to that in ES114.

299

300 We next examined the colony biofilm phenotype for strains lacking BinK. MB11B1  $\Delta binK$   
301 exhibited a mild colony biofilm phenotype at 48 h, as evidenced by the cohesiveness of the spot

302 when disrupted with a toothpick (Fig. 10C). The colonies also exhibited an opaque phenotype.  
303 In a minority of experimental replicates, wrinkled colony morphology was evident at 48 h, but in  
304 all samples wrinkled colony morphology was visible at 7 d (data not shown). The SR5  $\Delta binK$   
305 strain also exhibited slightly elevated biofilm morphology at 48 h, though the cells were not as  
306 cohesive as those of MB11B1  $\Delta binK$  (Fig. 10C). Together, the results in Figure 10 argue that  
307 BinK, a factor that has been characterized as a negative regulator of Syp biofilm, plays similar  
308 roles in Group A and Group C strains and has a widely-conserved function across the *V. fischeri*  
309 evolutionary tree.

310

## 311 **DISCUSSION**

312

313 This study examines regulation of a beneficial biofilm that is critical to host colonization  
314 specificity in *V. fischeri*. The Syp biofilm was discovered thirteen years ago and has been  
315 characterized extensively for its role in facilitating squid colonization by *V. fischeri*. This work  
316 establishes that the *syp* locus is required broadly across squid symbionts, and it uncovers three  
317 groups of *V. fischeri* that use different regulatory programs upstream of the *syp* locus. A  
318 simplified phylogenetic tree showing key features of squid symbionts in these three groups is  
319 shown in Figure 11.

320

321 There are three nested evolutionary groups of *V. fischeri* that have been described separately in  
322 the literature and here we formalize the nomenclature of Groups C, B, and A. Group A is a  
323 monophyletic group, as are Groups AB and ABC (Fig. 1). This work provides evidence that  
324 squid symbionts in each group have a distinct biofilm regulatory architecture. Most *V. fischeri*  
325 isolates that have been examined from the ancestral Group C cannot colonize squid; however,  
326 those that can colonize do so without the canonical biofilm regulator RscS. We show that the  
327 known targets of RscS regulation—genes in the *syp* biofilm locus—are nonetheless required for

328 squid colonization by this group. Group B strains include the well-characterized ES114 strain,  
329 which requires RscS and the *syp* locus to colonize squid. Group A strains differ phenotypically  
330 and behaviorally from the sister Group B strains (30), and we demonstrate that these strains  
331 have altered biofilm regulation. Group A strains have a frameshift in *rscS* that renders it  
332 nonfunctional, and a 1 bp deletion in *sypE*, and we provide evidence that the *sypE* allele  
333 promotes biofilm development in the absence of RscS. Additionally, we note that the *sypE*  
334 frameshift is not present in SR5, arguing for distinct modes of biofilm regulation in Groups A, B,  
335 and C.

336  
337 At the same time, this study provides evidence that some aspects of biofilm regulation are  
338 conserved in diverse squid symbionts, such as the effects of the strong biofilm negative  
339 regulator BinK. Published data indicate that evolved BinK alleles can alter colonization of H905  
340 (Group B) and MJ11 (Group C), and that a deletion of MJ11 *binK* leads to enhanced  
341 colonization (20). Our experiments in Figure 10 show a clear effect for BinK in all three  
342 phylogenetic groups. We also observed responsiveness to RscS overexpression in all squid  
343 symbionts examined (Fig. 2). CG101 was the only *V. fischeri* strain examined that did not exhibit  
344 a colony biofilm in response to RscS overexpression. CG101 was isolated from the Australian  
345 fish *Cleidopus gloriamaris*; based on these findings, we suspect that the strain does not have an  
346 intact *syp* locus or otherwise has divergent biofilm regulation.

347  
348 It remains a formal possibility that the entire *syp* locus is not required in Group A or Group C,  
349 but instead that only one or a subset of genes in the locus are needed. We have constructed  
350 Campbell-type (insertion duplication) alleles to interrupt *sypG* in MB11B1 and SR5, and  
351 additionally have isolated a transposon insertion in SR5 *sypJ*, and none were able to colonize  
352 well. Additionally, aggregation in squid mucus has been observed for the Group A strain  
353 MB13B2, and this aggregation is dependent on *sypQ* (40). In our data we note that Group A

354 strains were completely unable to colonize in the absence of the *syp* locus, unlike the tested  
355 Group B & C strains that exhibited reduced colonization in their respective mutants (Figs. 3, 6).  
356 Therefore, the simplest explanation is that the *syp* locus is required in divergent strains in a  
357 manner similar to how it is used in ES114. We think that the ability to completely delete the *syp*  
358 locus is a clean way to ask whether the locus is required for specific phenotypes, and our  
359 strains are likely to be useful tools in probing Syp protein function in diverse *V. fischeri* isolates.

360

361 It is intriguing to speculate as to how the two frameshifts in the Group A strains arose, and why  
362 the nonfunctional RscS is tolerated in this group. One possible scenario is that the Group A  
363 strains acquired a new regulatory input into the Syp pathway, and that the presence of this new  
364 regulator bypassed the requirement for RscS. We note that comparative genomic analysis of  
365 Hawaiian D (dominant)-type strains--which largely overlap with Group A--revealed an additional  
366 250 kb of genomic DNA compared to other isolates, yielding a large cache of genes that could  
367 play a role in this pathway (33). A related possibility is that *rscS*-independent colonization  
368 results from altered regulation of the *syp* locus, either due to changes in regulators (e.g. SypF)  
369 or sites that are conserved with Group B. An additional possibility is that the *sypE* frameshift  
370 arose, enabling Group A strains to colonize independent of *rscS*. Given that correction of this  
371 frameshift in MB11B1 does not significantly affect colonization ability (Fig. 9), this sequence of  
372 events seems less likely, and we expect that another regulator in MB11B1 is required for the  
373 RscS-independent colonization phenotype. There is evidence that under some conditions LuxU  
374 can regulate the *syp* biofilm (41), and as this protein is conserved in *V. fischeri* it may play an  
375 important role in Group A or Group C.

376

377 Results from two experimental conditions suggest that the Group A strains may have an  
378 elevated baseline level of biofilm formation. Our data indicate that in the absence of BinK or  
379 upon SypG overexpression, MB11B1 colonies exhibit strong cohesion under conditions in which

380 ES114 does not (Figs. 8, 10). Furthermore, we note that the Group A strain MB11B1, when  
381 lacking BinK, also exhibits a darker, or more opaque, colony phenotype (Fig. 10). This  
382 phenotype has been observed in some ES114 mutants (16) but not in the corresponding ES114  
383  $\Delta binK$  strain (Fig. 10). The entire colonization lifecycle likely requires a balance between biofilm  
384 formation/cohesion and biofilm dispersal, and these data argue that Group A strains may be  
385 more strongly tilted toward the biofilm-producing state. There is evidence that strains lacking  
386 BinK exhibit a colonization advantage in the laboratory (18, 20), suggesting that this strategy of  
387 more readily forming biofilms may provide a fitness advantage in nature. At the same time, the  
388 biofilm negative regulator BinK is conserved among *V. fischeri* strains examined (including  
389 MB11B1; Fig. 10), arguing that there is a benefit to reducing biofilm formation under some  
390 conditions.

391  
392 Our study provides hints as to the role of SypE in MB11B1 and other Group A strains. In ES114,  
393 the C-terminus is a PP2C serine kinase domain, whereas the N-terminus of SypE is an RsbW  
394 serine phosphatase domain. SypE acts to phosphorylate and dephosphorylate SypA Ser-56,  
395 with the unphosphorylated SypA being the active form to promote biofilm development (17). The  
396 balance between SypE kinase and phosphatase is modulated by a central two-component  
397 receiver domain (17). Our data that the MB11B1 *sypE* allele promotes biofilm formation suggest  
398 that the protein is tilted toward the phosphatase activity. In MB11B1, the frameshift early in *sypE*  
399 suggests that there is a different start codon and therefore a later start codon. An alternate GTG  
400 start codon in MB11B1 occurs corresponding to codon 18 in ES114 *sypE* (Fig. 7), and this is  
401 likely the earliest start for the MB11B1 polypeptide. We attempted to directly identify the SypE  
402 N-terminus by mass spectrometry, yet we could not identify the protein from either strain.  
403 Additional study is required to elucidate how MB11B1 SypE acts to promote biofilm formation.  
404

405 *V. fischeri* strains are valuable symbionts in which to probe the molecular basis to host  
406 colonization specificity in animals (22, 25, 26). A paradigm has emerged in which biofilm  
407 formation through the RscS-Syp pathway is required for squid colonization but not for fish  
408 colonization. This study affirms a role of the Syp biofilm, but at the same time points out  
409 divergent (RscS-independent) regulation in Group C and Group A isolates. In another well-  
410 studied example of symbiotic specificity, Rhizobial Nod factors are key to generating specificity  
411 with the plant host, yet strains have been identified that do not use this canonical pathway (42,  
412 43). Future work will elaborate on these RscS-independent pathways to determine how non-  
413 canonical squid colonization occurs in diverse natural isolates.

414

## 415 **MATERIALS & METHODS**

416

417 **Bacterial strains and growth conditions.** *V. fischeri* and *E. coli* strains used in this study can  
418 be found in Table 1. *E. coli* strains, used for cloning and conjugation, were grown in Luria-  
419 Bertani (LB) medium (25 g Difco LB Broth [BD] per liter). *V. fischeri* strains were grown in Luria-  
420 Bertani salt (LBS) medium (25 g Difco LB Broth [BD], 10 g NaCl, and 50 ml 1 M Tris buffer pH  
421 7.0, per liter). Growth media were solidified by adding 15 g Bacto agar (BD) per liter. When  
422 necessary, antibiotics (Gold Biotechnology) were added at the following concentrations:  
423 tetracycline, 5 µg/ml for *V. fischeri*; erythromycin, 5 µg/ml for *V. fischeri*; kanamycin, 50 µg/ml for  
424 *E. coli* and 100 µg/ml for *V. fischeri*; and chloramphenicol, 25 µg/ml for *E. coli*, 2.5 -5 µg/ml for  
425 Group B *V. fischeri*, and 1 - 2.5 µg/ml for Group A *V. fischeri*. The two MB11B1 / pKV69 strains  
426 listed reflect two separate constructions of this strain, though we have not identified any  
427 differences between them.

428

429 **Phylogenetic analysis.** Phylogenetic reconstructions assuming a tree-like topology were  
430 created with three methods: maximum parsimony (MP); maximum likelihood (ML); and



431 Bayesian inference (Bayes) as previously described (22, 30). Briefly, MP reconstructions were  
432 performed by treating gaps as missing, searching heuristically using random addition, tree-  
433 bisection reconnection with a maximum of 8 for swaps, and swapping on best only with 1000  
434 repetitions. For ML and Bayesian analyses, likelihood scores of 1500+ potential evolutionary  
435 models were evaluated using both the corrected and uncorrected Akaike Information Criterion,  
436 the Bayesian Information Criterion, and Decision Theory (Performance Based Selection) as  
437 implemented by jModelTest2.1 (44). For all information criteria, the most optimal evolutionary  
438 model was a symmetric model with a proportion of invariable sites and a gamma distribution of  
439 rate heterogeneity (SYM+I+ $\Gamma$ ).

440  
441 ML reconstruction was implemented via PAUP\*4.0a163 (45) by treating gaps as missing,  
442 searching heuristically using random addition, tree-bisection reconnection for swaps, and  
443 swapping on best only with 1000 repetitions. Bayesian inference was done by invoking the  
444 'nst=6' and 'rates=invgamma' and 'statefreqpr=fixed(equal)' settings in the software package  
445 MrBayes3.2.6 (46). The Metropolis-coupled Markov chain Monte Carlo (MCMCMC) algorithm  
446 used to estimate the posterior probability distribution for the sequences was set up with  
447 'temp=0.2' and one incrementally 'heated' chain with three 'cold' chains; these four chains were  
448 replicated two times per analysis to establish convergence of the Markov chains (i.e.,  
449 'stationarity' as defined by (47) and interpreted previously in (30)). For this work, stationarity was  
450 achieved after approximately 50,000 samples (5,000,000 generations) were collected, with 25%  
451 discarded. The ~37,500 samples included were used to construct a 50% majority-rule  
452 consensus tree from the sample distribution generated by MCMCMC and assess clades'  
453 posterior probabilities. For ML and MP analyses, the statistical confidence in the topology of  
454 each reconstruction was assessed using 1000 bootstrap replicates. Phylogenetic trees were  
455 visualized with FigTree 1.4.3 (<http://tree.bio.ed.ac.uk/software/figtree>); the final tree was edited  
456 for publication with Inkscape 0.91 (<http://inkscape.org/>) and GIMP 2.8.22 (<http://www.gimp.org/>).

457

458 **DNA synthesis and sequencing.** Each of the primers listed in Table 3 was synthesized by  
459 Integrated DNA Technologies (Coralville, IA). Full inserts from all cloned constructs were  
460 verified by Sanger DNA sequencing through ACGT, Inc via the Northwestern University  
461 Feinberg School of Medicine NUSeq Core Facility; or the University of Wisconsin-Madison  
462 Biotechnology Center. Sequence data was analyzed with SeqMan Pro (DNASTar software),  
463 SnapGene (GSL Biotech), and Benchling.

464

465 **Construction of gene deletions.** Deletions in *V. fischeri* strains ES114 and MB11B1 were  
466 made according to the lab's gene deletion protocol: doi:10.5281/zenodo.1470836. In brief, 1.6  
467 kb upstream and 1.6 kb downstream of the targeted gene or locus were cloned into linearized  
468 plasmid pEVS79 (amplified with primers pEVS79\_rev\_690/pEVS79\_for\_691) using Gibson  
469 Assembly (NEBuilder HiFi DNA Assembly cloning kit) with the primer combinations listed in  
470 Table S1. The Gibson mix, linking together the upstream and downstream flanking regions, was  
471 transformed into *E. coli* on plates containing X-gal, with several white colonies selected for  
472 further screening by PCR using primers flanking the upstream/downstream junction (Tables 3  
473 and S1). The resulting plasmid candidate was confirmed by sequencing and conjugated into the  
474 *V. fischeri* recipient by tri-parental mating with helper plasmid pEVS104, selecting for the  
475 chloramphenicol resistance of the plasmid backbone. *V. fischeri* colonies were first screened for  
476 single recombination into the chromosome by maintaining antibiotic resistance in the absence of  
477 selection and then screened for double recombination by the loss of both the antibiotic resistant  
478 cassette and the gene/locus of interest. Constructs were verified by PCR (Table 3) and  
479 sequencing.

480

481 Deletion of SR5 *binK* was conducted using Splicing by Overlap Extension PCR (SOE-PCR) and  
482 natural transformation (method modified from (48)). Oligos binK-F1 and binK-R1-LUH, and

483 oligos binK-F2-RUH and binK-R2 were used in a PCR with MJM1125 (SR5) genomic DNA as  
484 the template to amplify DNA fragments containing ~1 kb of sequence upstream and  
485 downstream relative to *binK*, respectively. Using SOE-PCR, these fragments were fused on  
486 either side to a third DNA fragment containing an Erm<sup>R</sup> cassette, which was amplified using  
487 pHB1 as template and oligos HB41 and HB42. We then used natural transformation with  
488 pLostfoX (49) to insert this mutagenic DNA into MJM1125, where the flanking sequences guide  
489 the Erm<sup>R</sup> cassette to replace *binK*, generating the desired gene deletion. Candidate SR5  $\Delta binK$   
490 mutants were selected after growth on LBS-Erm5 plates. Oligos binK-F1 and binK-R2, and HB8  
491 and binK-FO were used to screen candidates for the correct deletion scar by PCR, and oligos  
492 KMB\_036 and KMB\_037 were used to confirm the absence of *binK* in the genome. The deletion  
493 was verified by Sanger sequencing with primers HB8, HB9, HB42, and HB146. The base  
494 plasmid pHB1 contains an erythromycin resistance cassette flanked by FRT sites, and was  
495 constructed using oligos HB23 and HB39 with gBlock gHB1 (sequence in Supplementary File  
496 S1; Integrated DNA Technologies, Inc.) as template to amplify the Erm<sup>R</sup> cassette flanked by  
497 HindIII and BamHI sites, which was then cloned into the corresponding site in pUC19.

498

499 For most constructs, the deleted genetic material was between the start codon and last six  
500 amino acids (50), with two exceptions: the  $\Delta sypE$  in MJM1130 included the ATG that is two  
501 amino acids upstream of the predicted start codon, but not the canonical start codon; and the  
502  $\Delta binK$  alleles in MJM1117, MJM1130, and MJM2114, which were constructed to be equivalent  
503 to MJM2251 ( $\Delta binK$  in ES114) (18). The  $\Delta binK$  alleles in these strains include the start codon,  
504 the next six codons, two codons resulting from ATCGAT (ClaI site), and the last three codons  
505 for a predicted 12 amino acid peptide.

506

507 **Construction of *sypE* alleles.** To create *sypE*(ntG33 $\Delta$ ) in MJM1100 and *sypE*(nt33::G) in  
508 MJM1130, the single point mutation was created by amplifying the gene in two halves, with the

509 N-terminal portion consisting of approximately 300 bp upstream of *sypE* up through nucleotide  
510 33 and the C-terminal portion consisting of nucleotide 33 and the remaining *sypE* gene. The  
511 overlap between the two halves contained the single nucleotide polymorphism in the primers  
512 that connected them. The altered *sypE* alleles were initially cloned into plasmid pEVS107  
513 (linearized with primers pEVS107\_3837/pEVS107\_3838) using Gibson Assembly and then the  
514 entire altered *sypE* allele was subcloned into pEVS79 with Gibson Assembly (Table S1). After  
515 double recombination of the vector into *V. fischeri*, candidate colonies for the altered *sypE* in  
516 MJM1100 were screened with primers ES114\_indel\_for/ES114\_indel\_rev. The primer set  
517 anneals more strongly to the wildtype *sypE* sequence than to *sypE*(ntG33::Δ). Candidates in the  
518 MJM1100 background with a fainter PCR band were sequenced and confirmed to have the  
519 *sypE*(ntG33::Δ) allele. For MJM1130, the primer set MB11B1\_indel\_for/MB11B1\_indel\_rev  
520 anneals more strongly to the *sypE*(nt33::G) allele than to the naturally occurring *sypE* allele and  
521 candidates in MJM1130 that contained a more robust PCR band were selected for sequencing  
522 to be confirmed as being *sypE*(nt33::G).

523

524 **Construction of pKG11 *rscS1*(ntA1141::Δ).** Plasmid pKG11 encodes an overexpression allele  
525 of RscS, termed *rscS1* (15, 28). *rscS* nucleotide A1141 was deleted on the plasmid using the  
526 Stratagene Quikchange II Site-Directed Mutagenesis Kit with primers *rscS\_del1F* and  
527 *rscS\_del1R*. The resulting plasmid, pMJM33, was sequenced with primers MJM-154F and  
528 MJM-306R to confirm the single base pair deletion.

529

530 **Squid colonization.** Hatchling *E. scolopes* were colonized by exposure to approximately 3 x  
531 10<sup>3</sup> CFU/ml (ranging from 5.2 x 10<sup>2</sup> - 1.4 x 10<sup>4</sup> CFU/ml; as specified in figure legends) of each  
532 strain in a total volume of 40 ml of FSIO (filter-sterilized Instant Ocean) for 3 hours. Squid were  
533 then transferred to 100 ml of FSIO to stop the inoculation and then transferred to 40 ml FSIO for  
534 an additional 45 hours with a water change at 24 hours post inoculation. For Figure 10A,

535 kanamycin was added to the FSIO to keep selective pressure on the plasmid. After 48 hours of  
536 colonization, the squid were euthanized and surface sterilized by storage at -80 °C, according to  
537 standard practices (51). For determination of CFU per light organ, hatchlings were thawed,  
538 homogenized, and 50 µl of homogenate dilutions was plated onto LBS plates. Bacterial colonies  
539 from each plate were counted and recorded. Mock treated, uncolonized hatchlings (“apo-  
540 symbiotic”) were used to determine the limit of detection in the assay. The competitive index  
541 (CI) was calculated from the relative CFU of each sample in the output (light organ) versus the  
542 input (inoculum) as follows:

543  $\text{Log}_{10} ((\text{Test strain}[\text{light organ}] / \text{Control strain}[\text{light organ}]) / (\text{Test strain}[\text{inoculum}] / \text{Control}$   
544  $\text{strain}[\text{inoculum}])))$ . For competitions of natural isolates, the Group A strain (or its  $\Delta rscS$   
545 derivative) was the test strain and the Group B strain was the control strain. Colony color was  
546 used to enumerate colonies from each--white for Group A strains MB11B1 and ES213; yellow  
547 for Group B strains ES114 and MB15A4--along with PCR verification of selected colonies. For  
548 competition between SR5 and SR5  $\Delta binK$ , 100 colonies per squid were patched onto LBS-Erm5  
549 and LBS.

550

551 **Colony biofilm assays.** Bacterial strains were grown in LBS media (Fig. 10C) or LBS-Cam2.5  
552 media (Figs. 2, 8) for approximately 17 hours, then 10 µl (Fig. 2) or 8 µl (Fig. 8, 10C) was  
553 spotted onto LBS plates (Fig. 10C) or LBS-Tet5 plates (Figs. 2, 8). Spots were allowed to dry  
554 and the plates incubated at 25 °C for 48 hours. Images of the spots were taken at 24 and 48 h  
555 post-spotting using a Leica M60 microscope and Leica DFC295 camera. After 48 h of growth,  
556 the spots were disrupted using a flat toothpick and imaged similarly.

557

558 **Analysis of DNA and protein sequences *in silico*.** Amino acid sequences for *V. fischeri*  
559 ES114 *syp* genes were obtained from RefSeq accession NC\_006841.2. Local TBLASTN  
560 queries were performed for each protein against nucleotide databases for the following strains,

561 each of which were derived from the RefSeq cds\_from\_genomic.fna file: *V. fischeri* SR5  
562 (GCA\_000241785.1), *V. fischeri* MB11B1 (GCA\_001640385.1) and *V. vulnificus* ATCC27562  
563 (GCA\_002224265.1). Percent amino acid identity was calculated as the identity in the BLAST  
564 query divided by the length of the amino acid sequence in ES114. Domain information is from  
565 the PFAM database (52).

566

## 567 **FIGURE LEGENDS**

568 **Figure 1. *Vibrio fischeri* phylogeny, highlighting the source of each strain.** Bayesian  
569 phylogram (50% majority-rule consensus) inferred with a SYM+I+ $\Gamma$  model of evolution for the  
570 concatenated gene fragments *recA*, *mdh*, and *katA*. In this reconstruction, the root connected to  
571 a clade containing the four non-*V. fischeri* outgroup taxa. Statistical support is represented at  
572 nodes by the following three numbers: upper left, Bayesian posterior probability (of  
573 approximately 37,500 non-discarded samples) multiplied by 100; upper right, percentage of  
574 1000 bootstrap Maximum Likelihood pseudo-replicates; bottom middle center, percentage of  
575 1000 bootstrap Maximum Parsimony pseudo-replicates. Statistical support values are listed only  
576 at nodes where more than 2 methods generated support values  $\geq 50\%$ . Strains sharing identical  
577 sequences for a given locus fragment are listed next to a vertical bar at a leaf; because of a lack  
578 of space, some support values have been listed either immediately to the right of their  
579 associated nodes and are marked with italicized lower-case Roman numerals in the phylogram.  
580 The isolation habitat and geography of each strain are indicated by symbol and color,  
581 respectively. The black bar represents 0.01 substitutions/site.

582

583 **Figure 2. Most *V. fischeri* strains tested form colony biofilm in response to RscS**  
584 **overexpression.** Spot assays of the indicated *V. fischeri* strains carrying pKV69 (vector) or  
585 pKG11 (*rscS1*; overexpressing ES114 *rscS*) after 24 and 48 h. Strains are MJM1268,  
586 MJM1269, MJM1246, MJM1247, MJM1266, MJM1267, MJM1219, MJM1221, MJM1238,

587 MJM1239, MJM1104, MJM1106, MJM1276, MJM1277, MJM1270, MJM1271, MJM1258,  
588 MJM1259, MJM1254, MJM1255, MJM1242, MJM1243, MJM1240, MJM1241, MJM1272,  
589 MJM1273, MJM1274, MJM1275, MJM1278, MJM1279, MJM1109, MJM1111, MJM1280,  
590 MJM1281, MJM1260, MJM1261, MJM1244, MJM1245, MJM1256, and MJM1257. Different  
591 phenotypes were observed in the isolates examined; in most cases we observed wrinkled  
592 colonies, but in some cases we observed only a subtle pocked pattern (EM30), and in other  
593 cases we did not observe any change in colony morphology compared to the vector control  
594 (noted by \*). The black bar is 5 mm in length.

595

596

597 **Figure 3. Squid colonization in Group C strain SR5, which does not encode RscS, is**  
598 **dependent on the *syp* polysaccharide locus.** Single-strain colonization experiments were  
599 conducted and circles represent individual animals. The limit of detection for this assay,  
600 represented by the dashed line, is 7 CFU/LO, and the horizontal bars represent the median of  
601 each set. Hatchling squid were inoculated with  $1.5\text{-}3.2 \times 10^3$  CFU/ml bacteria, washed at 3 h  
602 and 24 h, and assayed at 48 h. Each dot represents an individual squid. Strains are: MJM1100,  
603 MJM3010, MJM3062, MJM1125, and MJM3501. Statistical comparisons by the Mann-Whitney  
604 test, \*\*  $p < 0.01$ , \*\*\*  $p < 0.001$ , \*\*\*\*  $p < 0.0001$ .

605

606 **Figure 4. Group A strains have a frameshift in *rscS*.** (A) ES114 RscS protein domains.  
607 Nucleotides 1114-1173 in ES114 RscS (AF319618) and their homologous sequences in the  
608 other Group B and Group A strains are listed. The -1 frameshift is present in the Group A *rscS*  
609 alleles. The ES114 reading frame is noted on the top of the alignment and the Group A reading  
610 frame on the bottom, which is predicted to end at the amber stop codon. (B) Deletion of  
611 nucleotide A1141 in ES114 to mimic this frameshift in pKG11 renders it unable to induce a  
612 colony biofilm in a spot assay at 48 h. Strains are MJM1104, MJM1106, and MJM2226.

613

614 **Figure 5. Group A strains MB11B1 and ES213 do not require RscS for squid colonization.**

615 Wild-type (WT) and  $\Delta rscS$  derivatives of the indicated strains were assayed in (A) a single-strain  
616 colonization assay and (B) competitive colonization against Group B strain MB15A4. Hatchling  
617 squid were inoculated at  $3.5\text{-}14 \times 10^3$  CFU/ml bacteria, washed at 3 h and 24 h, and assayed at  
618 48 h. Each dot represents an individual squid. (A) Strains: MJM1100, MJM3010, MJM2114,  
619 MJM3042, MJM1130, MJM3046, MJM1117, and MJM3017. The limit of detection is represented  
620 by the dashed line, and the horizontal bars represent the median of each set. In both panels,  
621 open dots are wild type and filled dots are  $\Delta rscS$ . (B) The competitive index (CI) is defined in the  
622 methods and is shown on a  $\text{Log}_{10}$  scale. Strains: MJM1130 and MJM3046, each competed  
623 against MJM2114. Values greater than 1 indicate more MB11B1. Statistical comparisons by the  
624 Mann-Whitney test, ns not significant, \*\*\*\*  $p < 0.0001$ .

625

626 **Figure 6. Group B and Group A strains require the *syp* locus for robust squid**

627 **colonization.** Wild type (WT) and  $\Delta syp$  derivatives of the indicated strains were assayed in a  
628 single strain colonization assay. Hatchling squid were inoculated with  $6.7\text{-}32 \times 10^2$  CFU/ml  
629 bacteria (ES114 and MB15A4 backgrounds) or  $5.2\text{-}8.9 \times 10^2$  CFU/ml bacteria (MB11B1 and  
630 ES213 backgrounds), washed at 3 h and 24 h, and assayed at 48 h. Each dot represents an  
631 individual squid. The limit of detection is represented by the dashed line and the horizontal bars  
632 represent the median of each set. Strains are MJM1100, MJM3062, MJM2114, MJM3071,  
633 MJM1130, MJM3065, MJM1117, and MJM3068. Statistical comparisons by the Mann-Whitney  
634 test, \*\*\*\*  $p < 0.0001$ .

635

636 **Figure 7. Group A strains have a frameshift in *sypE*.** (A) Amino acid identity in the *Syp* locus.

637 Results show the identity from TBLASTN query using the *V. fischeri* ES114 protein sequences  
638 as queries against genes in the homologous loci in *V. fischeri* strains or *V. vulnificus* ATCC



639 27562. The identity for SypE against *V. vulnificus* is plotted for the syntenous RbdE, although  
640 this is not the highest TBLASTN hit, as described in the text. (B) ES114 SypE protein domains.  
641 Nucleotides 1-60 in ES114 *sypE* and their homologous sequences in the other Group C, B, and  
642 A strains are listed. A -1 frameshift is present in the Group A *sypE* alleles. The ES114 reading  
643 frame is noted on the top of the alignment and the Group A reading frame on the bottom, which  
644 is predicted to end at the amber stop codon. A possible GTG start codon for the resumption of  
645 translation in the ES114 reading frame is present at the position corresponding to the 18th  
646 codon in ES114 *sypE*.

647  
648 **Figure 8. The MB11B1 *sypE* frameshift leads to an enhanced biofilm phenotype upon**  
649 **SypG overexpression.** Spot assays of strains carrying the pKV69 vector or pEAH73 SypG  
650 overexpression plasmid. (A) ES114 strain background. Strains lacking SypE produce a wrinkled  
651 colony phenotype upon SypG overexpression. Deletion of nucleotide 33 in *sypE* to mimic the  
652 Group A frameshift led to earlier wrinkling and a more pronounced colony biofilm at 48 h.  
653 Strains: MJM1104, MJM3455, MJM3418, MJM3419, MJM3364, and MJM3365. (B) Group A  
654 strain MB11B1, which naturally carries a -1 frameshift in *sypE*, exhibits a cohesive phenotype at  
655 48 h with overexpression of SypG. Deletion of *sypE* reduces this phenotype, and repairing the  
656 frameshift by addition of a guanosine at nucleotide 33 further reduces the cohesiveness of the  
657 spot. Strains: MJM3370, MJM3371, MJM3411, MJM3412, MJM3398, and MJM3399.

658  
659 **Figure 9. The *sypE* -1 frameshift allele is not sufficient to affect colonization ability.** The  
660 indicated strains were assayed in a single-strain colonization assay. Gray boxes denote alleles  
661 distinct from their wild-type background. Frameshift “fs” refers to alleles--relative to an ES114  
662 reference--that lack *rscS* nucleotide A1141, or that lack *sypE* nucleotide G33. The wild-type  
663 MB11B1 strain contains natural frameshifts in these loci, and the ES114 nt33:: $\Delta$ G allele was  
664 constructed. Addition back of the nucleotide in MB11B1 *sypE* is denoted as “(+)”. Hatchling

665 squid were inoculated with  $6.8\text{-}8.4 \times 10^2$  CFU/ml bacteria (MB11B1 background) or  $4.0\text{-}5.4 \times$   
666  $10^3$  CFU/ml bacteria (ES114 background), washed at 3 h and 24 h, and assayed at 48 h. Each  
667 dot represents an individual squid. The limit of detection is represented by the dashed line and  
668 the horizontal bars represent the median of each set. Strains are MJM1100, MJM3010,  
669 MJM4323, MJM3394, MJM1130, and MJM3397. Statistical comparisons by the Mann-Whitney  
670 test, ns not significant.

671  
672 **Figure 10. BinK is active in Groups A, B, and C.** (A) Overexpression of pBinK inhibits  
673 colonization in Group A strain MB11B1. Hatchling squid were inoculated with  $3.6\text{-}6.8 \times 10^3$   
674 CFU/ml bacteria, washed at 3 h and 24 h, and assayed at 48 h. Each dot represents an  
675 individual squid. The limit of detection is represented by the dashed line and the horizontal bars  
676 represent the median of each set. The vector control is pVSV104. Strains are MJM1782,  
677 MJM2386, MJM2997, and MJM2998. (B) Deletion of *binK* confers a colonization defect in Group  
678 C strain SR5. Strains are MJM1125 and MJM3571; mean inoculum of  $7.2 \times 10^3$  CFU/ml;  
679 median competitive index (CI) was 0.38 (i.e., 2.4-fold advantage for the mutant). (C) Deletion of  
680 the native *binK* in MB11B1 yielded opaque and cohesive spots, which are stronger phenotypes  
681 than we observe in ES114. Strains are MJM1100, MJM2251, MJM1130, MJM3084, MJM2997,  
682 and MJM2998. Statistical comparisons by the Mann-Whitney test, \*\*\*\*  $p < 0.0001$ .

683  
684 **Figure 11. Summary model of distinct modes of biofilm formation in squid-colonizing *V.***  
685 ***fischeri*.** Phylogenetic tree is simplified from Figure 1, and illustrates key features of squid  
686 symbionts in the three groups. Shown are divergent aspects (RscS, SypE) and conserved  
687 regulation (BinK). In all groups, the *syp* exopolysaccharide locus is required for squid  
688 colonization.

689

690 **SUPPLEMENTAL FILES**

691

692 **Table S1 (PDF). Primer pairs for construction of the deletion mutants.** Detailed

693 oligonucleotide and construction details for deletions and the MJM1100 *sypE*(ntG33Δ) and

694 MJM1130 *sypE*(nt33::G) strains.

695

696 **File S1 (PDF). Sequence of the synthetic dsDNA, gBlock\_erm.** The sequence is provided in

697 FASTA format printed as PDF.

698

699

700 **Table 1. Bacterial strains.**

| Strain             | Genotype                | Source/Reference |
|--------------------|-------------------------|------------------|
| <i>V. fischeri</i> |                         |                  |
| MJM1059            | MJ11                    | (25, 53)         |
| MJM1100            | ES114                   | (54)             |
| MJM1104            | ES114 (MJM1100) / pKV69 | This study       |
| MJM1106            | ES114 (MJM1100) / pKG11 | This study       |
| MJM1109            | MJ11 (MJM1059) / pKV69  | This study       |
| MJM1111            | MJ11 (MJM1059) / pKG11  | This study       |
| MJM1114            | MJ12                    | (53)             |
| MJM1115            | CG101                   | (25)             |

|         |                          |            |
|---------|--------------------------|------------|
| MJM1117 | ES213                    | (55)       |
| MJM1119 | EM18                     | (25, 53)   |
| MJM1120 | EM24                     | (53, 56)   |
| MJM1121 | EM30                     | (53)       |
| MJM1122 | WH1                      | (57)       |
| MJM1125 | SR5                      | (24)       |
| MJM1126 | SA1                      | (24)       |
| MJM1127 | KB1A97                   | (29)       |
| MJM1128 | KB2B1                    | (29)       |
| MJM1129 | KB5A1                    | (29)       |
| MJM1130 | MB11B1                   | (29)       |
| MJM1136 | EM17                     | (56)       |
| MJM1147 | <i>mjapo.6.1</i>         | (22)       |
| MJM1149 | <i>mjapo.7.1</i>         | (22)       |
| MJM1151 | <i>mjapo.8.1</i>         | (22)       |
| MJM1153 | <i>mjapo.9.1</i>         | (22)       |
| MJM1219 | <i>mjapo.8.1</i> / pKV69 | This study |

|         |                          |            |
|---------|--------------------------|------------|
| MJM1221 | <i>mjapo.8.1</i> / pKG11 | This study |
| MJM1238 | MJ12 (MJM1114) / pKV69   | This study |
| MJM1239 | MJ12 (MJM1114) / pKG11   | This study |
| MJM1240 | SR5 (MJM1125) / pKV69    | This study |
| MJM1241 | SR5 (MJM1125) / pKG11    | This study |
| MJM1242 | SA1 (MJM1126) / pKV69    | This study |
| MJM1243 | SA1 (MJM1126) / pKG11    | This study |
| MJM1244 | MB11B1 (MJM1130) / pKV69 | This study |
| MJM1245 | MB11B1 (MJM1130) / pKG11 | This study |
| MJM1246 | EM17 (MJM1136) / pKV69   | This study |
| MJM1247 | EM17 (MJM1136) / pKG11   | This study |
| MJM1254 | KB1A97 (MJM1127) / pKV69 | This study |
| MJM1255 | KB1A97 (MJM1127) / pKG11 | This study |
| MJM1256 | KB2B1 (MJM1128) / pKV69  | This study |
| MJM1257 | KB2B1 (MJM1128) / pKG11  | This study |
| MJM1258 | KB5A1 (MJM1129) / pKV69  | This study |
| MJM1259 | KB5A1 (MJM1129) / pKG11  | This study |

|         |                                    |            |
|---------|------------------------------------|------------|
| MJM1260 | ES213 (MJM1117) / pKV69            | This study |
| MJM1261 | ES213 (MJM1117) / pKG11            | This study |
| MJM1266 | EM18 (MJM1119) / pKV69             | This study |
| MJM1267 | EM18 (MJM1119) / pKG11             | This study |
| MJM1268 | EM24 (MJM1120) / pKV69             | This study |
| MJM1269 | EM24 (MJM1120) / pKG11             | This study |
| MJM1270 | EM30 (MJM1121) / pKV69             | This study |
| MJM1271 | EM30 (MJM1121) / pKG11             | This study |
| MJM1272 | <i>mjapo.6.1</i> (MJM1147) / pKV69 | This study |
| MJM1273 | <i>mjapo.6.1</i> (MJM1147) / pKG11 | This study |
| MJM1274 | <i>mjapo.7.1</i> (MJM1149) / pKV69 | This study |
| MJM1275 | <i>mjapo.7.1</i> (MJM1149) / pKG11 | This study |
| MJM1276 | <i>mjapo.9.1</i> (MJM1151) / pKV69 | This study |
| MJM1277 | <i>mjapo.9.1</i> (MJM1151) / pKG11 | This study |
| MJM1278 | CG101 (MJM1115) / pKV69            | This study |
| MJM1279 | CG101 (MJM1115) / pKG11            | This study |
| MJM1280 | WH1 (MJM1122) / pKV69              | This study |

|         |                                |            |
|---------|--------------------------------|------------|
| MJM1281 | WH1 (MJM1122) / pKG11          | This study |
| MJM1782 | ES114 (MJM1100) pVSV104        | (18)       |
| MJM2114 | MB15A4                         | (29)       |
| MJM2226 | ES114 (MJM1100) / pMJM33       | This study |
| MJM2251 | ES114 (MJM1100) $\Delta binK$  | (18)       |
| MJM2386 | ES114 (MJM1100) / pBinK        | This study |
| MJM2997 | MB11B1 (MJM1130) / pVSV104     | This study |
| MJM2998 | MB11B1 (MJM1130) / pBinK       | This study |
| MJM2999 | ES213 (MJM1117) / pVSV104      | This study |
| MJM3000 | ES213 (MJM1117) / pBinK        | This study |
| MJM3010 | ES114 (MJM1100) $\Delta rscS$  | This study |
| MJM3017 | ES213 (MJM1117) $\Delta rscS$  | This study |
| MJM3042 | MB15A4 (MJM2114) $\Delta rscS$ | This study |
| MJM3046 | MB11B1 (MJM1130) $\Delta rscS$ | This study |
| MJM3062 | ES114 (MJM1100) $\Delta syp$   | This study |
| MJM3065 | MB11B1 (MJM1130) $\Delta syp$  | This study |
| MJM3068 | ES213 (MJM1117) $\Delta syp$   | This study |

|         |                                                             |            |
|---------|-------------------------------------------------------------|------------|
| MJM3071 | MB15A4 (MJM2114) $\Delta syp$                               | This study |
| MJM3084 | MB11B1 (MJM1130) $\Delta binK$                              | This study |
| MJM3354 | ES114 (MJM1100) <i>sypE</i> (ntG33 $\Delta$ )               | This study |
| MJM3364 | ES114 (MJM1100) <i>sypE</i> (ntG33 $\Delta$ ) / pKV69       | This study |
| MJM3365 | ES114 (MJM1100) <i>sypE</i> (ntG33 $\Delta$ ) / pEAH73      | This study |
| MJM3370 | MB11B1 (MJM1130) / pKV69                                    | This study |
| MJM3371 | MB11B1 (MJM1130) / pEAH73                                   | This study |
| MJM3394 | ES114 (MJM1100) $\Delta rscS$ <i>sypE</i> (ntG33 $\Delta$ ) | This study |
| MJM3397 | MB11B1 (MJM1130) <i>sypE</i> (nt33::G)                      | This study |
| MJM3398 | MB11B1 (MJM1130) <i>sypE</i> (nt33::G) / pKV69              | This study |
| MJM3399 | MB11B1 (MJM1130) <i>sypE</i> (nt33::G) / pEAH73             | This study |
| MJM3410 | MB11B1 (MJM1130) $\Delta sypE$                              | This study |
| MJM3411 | MB11B1 (MJM1130) $\Delta sypE$ / pKV69                      | This study |
| MJM3412 | MB11B1 (MJM1130) $\Delta sypE$ / pEAH73                     | This study |
| MJM3417 | ES114 (MJM1100) $\Delta sypE$                               | This study |
| MJM3418 | ES114 (MJM1100) $\Delta sypE$ / pKV69                       | This study |
| MJM3419 | ES114 (MJM1100) $\Delta sypE$ / pEAH73                      | This study |



|                |                                                              |            |
|----------------|--------------------------------------------------------------|------------|
| MJM3423        | ES114 (MJM1100) $\Delta rscS \Delta sypE$                    | This study |
| MJM3455        | ES114 (MJM1100) / pEAH73                                     | This study |
| MJM3501        | SR5 (MJM1125) $\Delta syp$                                   | This study |
| MJM3751        | SR5 (MJM1125) $\Delta binK::erm$                             | This study |
| <i>E. coli</i> |                                                              |            |
| MJM534         | CC118 $\lambda pir$ / pEVS104                                | (58)       |
| MJM537         | DH5 $\alpha$ $\lambda pir$                                   | Lab stock  |
| MJM570         | DH5 $\alpha$ / pEVS79                                        | (58)       |
| MJM580         | DH5 $\alpha$ $\lambda pir$ / pVSV104                         | (59)       |
| MJM581         | DH5 $\alpha$ / pKV69                                         | (60)       |
| MJM583         | DH5 $\alpha$ / pKG11                                         | (15)       |
| MJM639         | XL1-Blue / pMJM33                                            | This study |
| MJM658         | BW23474 / pEVS107                                            | (61)       |
| MJM2384        | DH5 $\alpha$ $\lambda pir$ / pBinK                           | (18)       |
| MJM2540        | KV5264 / pEAH73                                              | (39)       |
| MJM3008        | DH5 $\alpha$ / pEVS79- $\Delta rscS$ [MJM1100]               | This study |
| MJM3014        | DH5 $\alpha$ $\lambda pir$ / pEVS79- $\Delta rscS$ [MJM1117] | This study |

|         |                                                     |            |
|---------|-----------------------------------------------------|------------|
| MJM3039 | DH5α λpir / pEVS79-Δ <i>rscS</i> [MJM2114]          | This study |
| MJM3043 | DH5α λpir / pEVS79-Δ <i>rscS</i> [MJM1130]          | This study |
| MJM3060 | NEB5α / pEVS79-Δ <i>syp</i> [MJM1100]               | This study |
| MJM3063 | NEB5α / pEVS79-Δ <i>syp</i> [MJM1130]               | This study |
| MJM3066 | DH5α λpir / pEVS79-Δ <i>syp</i> [MJM1117]           | This study |
| MJM3069 | DH5α λpir / pEVS79-Δ <i>syp</i> [MJM2114]           | This study |
| MJM3082 | NEB5α / pEVS79-Δ <i>binK</i> [MJM1130]              | This study |
| MJM3287 | NEB5α / pHB1                                        | This study |
| MJM3338 | DH5α λpir / pEVS107- <i>sypE</i> [MJM1130](nt33::G) | This study |
| MJM3340 | DH5α λpir / pEVS107- <i>sypE</i> [MJM1100](ntG33Δ)  | This study |
| MJM3351 | NEB5α / pEVS79- <i>sypE</i> [MJM1130](nt33::G)      | This study |
| MJM3352 | NEB5α / pEVS79- <i>sypE</i> [MJM1100](ntG33Δ)       | This study |
| MJM3409 | NEB5α / pEVS79-Δ <i>sypE</i> [MJM1130]              | This study |
| MJM3416 | NEB5α / pEVS79-Δ <i>sypE</i> [MJM1100]              | This study |

701

702 **Table 2. Plasmids.**

| Plasmid | Relevant genotype                                | Source/Reference |
|---------|--------------------------------------------------|------------------|
| pEVS79  | Vector backbone (Cam <sup>R</sup> ) for deletion | (58)             |

|                                            |                                                                                 |            |
|--------------------------------------------|---------------------------------------------------------------------------------|------------|
|                                            | construction                                                                    |            |
| pKV69                                      | Vector backbone (Cam <sup>R</sup> /Tet <sup>R</sup> )                           | (60)       |
| pKG11                                      | pKV69 carrying <i>rscS1</i>                                                     | (15)       |
| pMJM33                                     | pKG11 <i>rscS1</i> (ntA1141::Δ)                                                 | This study |
| pEVS104                                    | Conjugation helper plasmid (Kan <sup>R</sup> )                                  | (58)       |
| pEVS107                                    | Mini-Tn7 mobilizable vector (Erm <sup>R</sup> /Kan <sup>R</sup> )               | (61)       |
| pEAH73                                     | pKV69 carrying <i>sypG</i> from ES114                                           | (39)       |
| pVSV104                                    | Complementation vector (Kan <sup>R</sup> )                                      | (59)       |
| pBinK                                      | pVSV104 carrying <i>binK</i> from MJM1100                                       | (18)       |
| pHB1                                       | pUC19 FRT- <i>erm</i> -FRT                                                      | This study |
| pEVS79-Δ <i>rscS</i> [MJM1100]             | pEVS79 carrying 1.6 kb US/1.6 kb DS of <i>rscS</i> from MJM1100                 | This study |
| pEVS79-Δ <i>rscS</i> [MJM1117]             | pEVS79 carrying 1.6 kb US/1.6 kb DS of <i>rscS</i> from MJM1117                 | This study |
| pEVS79-Δ <i>rscS</i> [MJM2114]             | pEVS79 carrying 1.6 kb US/1.6 kb DS of <i>rscS</i> from MJM2114                 | This study |
| DH5α λpir / pEVS79-Δ <i>rscS</i> [MJM1130] | pEVS79 carrying 1.6 kb US/1.6 kb DS of <i>rscS</i> from MJM1130                 | This study |
| pEVS79-Δ <i>syp</i> [MJM1100]              | pEVS79 carrying 1.6 kb US of <i>sypA</i> /1.6 kb DS of <i>sypR</i> from MJM1100 | This study |
| pEVS79-Δ <i>syp</i> [MJM1130]              | pEVS79 carrying 1.6 kb US of <i>sypA</i> /1.6 kb DS of <i>sypR</i> from MJM1130 | This study |
| pEVS79-Δ <i>syp</i> [MJM1117]              | pEVS79 carrying 1.6 kb US of <i>sypA</i> /1.6 kb DS of <i>sypR</i> from MJM1117 | This study |

|                                                 |                                                                                 |            |
|-------------------------------------------------|---------------------------------------------------------------------------------|------------|
| pEVS79- $\Delta$ <i>syp</i> [MJM2114]           | pEVS79 carrying 1.6 kb US of <i>sypA</i> /1.6 kb DS of <i>sypR</i> from MJM2114 | This study |
| pEVS79- $\Delta$ <i>binK</i> [MJM1130]          | pEVS79 carrying 1.6 kb US/1.6 kb DS of <i>binK</i> from MJM1130                 | This study |
| pEVS107- <i>sypE</i> [MJM1130](nt33::G)         | pEVS107 carrying the <i>sypE</i> (nt33::G) allele from MJM1130                  | This study |
| pEVS107- <i>sypE</i> [MJM1100](ntG33 $\Delta$ ) | pEVS107 carrying the <i>sypE</i> (ntG33 $\Delta$ ) allele from MJM1100          | This study |
| pEVS79- <i>sypE</i> [MJM1130](nt33::G)          | pEVS79 carrying the <i>sypE</i> (nt33::G) allele from MJM1130                   | This study |
| pEVS79- <i>sypE</i> [MJM1100](ntG33 $\Delta$ )  | pEVS79 carrying the <i>sypE</i> (ntG33 $\Delta$ ) allele from MJM1100           | This study |
| pEVS79- $\Delta$ <i>sypE</i> [MJM1130]          | pEVS79 carrying 1.6 kb US/1.6 kb DS of <i>sypE</i> from MJM1130                 | This study |
| pEVS79- $\Delta$ <i>sypE</i> [MJM1100]          | pEVS79 carrying 1.6 kb US/1.6 kb DS of <i>sypE</i> from MJM1100                 | This study |

703

704

705 **Table 3. DNA oligonucleotides for PCR amplification and sequencing.**

| Primer name     | Sequence (5' to 3')      |
|-----------------|--------------------------|
| DAT_015F        | ACCAAGAAGCAGTACGACGATTAT |
| ES114_DS_ver    | GGATGTTTTAGATGTTGCGG     |
| ES114_indel_for | TTACTTTTTTCAGATACAAAGCCC |
| ES114_indel_rev | GTTGTTCTGATAGTGCGTGA     |
| ES114_US_ver    | ATCAACTCAAGAACTCCCC      |

|                       |                                                  |
|-----------------------|--------------------------------------------------|
| for_ver_sypE          | CCGGCTCAAAC TATTGCAG                             |
| Gib_ES114_binK_DS_for | attaatcgatGCGTATACATAAATAATGATTCATATATAC         |
| Gib_ES114_binK_DS_rev | gcaggaattcgatatcaagcTTTCAATACTGTGTTTTTATGC       |
| Gib_ES114_binK_US_for | gaggtcgacggtatcgataaGAGCCTTTTAAATCCCCTAAC        |
| Gib_ES114_binK_US_rev | atgtatacgcATCGATTAATGACATATTATTATTCATAAAA<br>AAC |
| Gib_ES114_rscS_DS_for | taatgcaatgGAGAAGTATGAAACACAATAAAC                |
| Gib_ES114_rscS_DS_rev | gcaggaattcgatatcaagcAAAAATACATTGTTGCACTTG        |
| Gib_ES114_rscS_US_for | gaggtcgacggtatcgataaGACGTCTAAAAC TGAATCG         |
| Gib_ES114_rscS_US_rev | catacttctcCATTGCATTAGCTCCTATAAAATAG              |
| Gib_ES114_syp_DS_for  | gcttattatgATATTTGCTCGAGGCCAATAAAAAC              |
| Gib_ES114_syp_DS_rev  | gcaggaattcgatatcaagcTGGTGAATGTAGGATCCAC          |
| Gib_ES114_syp_US_for  | gaggtcgacggtatcgataaCAACCGTAGCGCCAAATG           |
| Gib_ES114_syp_US_rev  | gagcaaataatCATAATAAGCTCCTAGGGAATAATC             |
| Gib_ES114_sypE_C_for  | cagatacaaaaCCCACATCACTAGAGTCG                    |
| Gib_ES114_sypE_C_rev  | ctagtggccaggtacctcgaAATTAAGCTTCCATCTTCAC         |
| Gib_ES114_sypE_DS_for | tgtaatcatgCTGTTAATTGAGAATCAATAAAAAG              |
| Gib_ES114_sypE_DS_rev | caactcttttccgaaggtaTTGAGTAACCGGCATAATTTAG        |

|                        |                                                        |
|------------------------|--------------------------------------------------------|
| Gib_ES114_sypE_N_for   | tagagggccctaggcgcgccTGTTTCACAACCTCAATACC               |
| Gib_ES114_sypE_N_rev   | gtgatgtgggTTTGTATCTGAAAAAAGTAAAGTAG                    |
| Gib_ES114_sypE_US_for  | gaggtcgacggtatcgataaTGGTCAGATGAAATGTCATTTT<br>TAG      |
| Gib_ES114_sypE_US_rev  | caattaacagCATGATTACACCACTGTTG                          |
| Gib_ES213_rscS_US_rev  | catacttctcCATTGTATTAGCTCCTATAAAATAG                    |
| Gib_MB11B1_syp_DS_for  | gcttattatgATATTTGCTCGAGGTCAATAAAAG                     |
| Gib_MB11B1_syp_US_for  | gaggtcgacggtatcgataaGCACACTGATAACTAAATTATTA<br>C       |
| Gib_MB11B1_syp_US_rev  | gagcaaatatCATAATAAGCTCCTAGGG                           |
| Gib_MB11B1_sypE_C_for  | cagatacaaaGCCAACATCACTAGAATC                           |
| Gib_MB11B1_sypE_C_rev  | ctagtggccaggctacctcgaTCAACAATTAAGCTTCCATC              |
| Gib_MB11B1_sypE_DS_for | cagtggtatgCTGTTAATTGAAAACCAATAGC                       |
| Gib_MB11B1_sypE_DS_rev | gcaggaattcgatatcaagcATTTAGGATGTTTTTAATAACAA<br>TTTG    |
| Gib_MB11B1_sypE_N_for  | tagagggccctaggcgcgccAGTTTCACAACCTCAATACTAAT<br>AATATTC |
| Gib_MB11B1_sypE_N_rev  | tgatgtggcTTTGTATCTGAAAAAAGCAAAATAG                     |
| Gib_MB11B1_sypE_US_for | gaggtcgacggtatcgataaGAATGGTCAGATGAAATGTC               |
| Gib_MB11B1_sypE_US_rev | caattaacagCATACCACTGTTGATAAAAATC                       |
| Gib_pEVS79_ES_sypE_for | gaggtcgacggtatcgataaTGTTTCACAACCTCAATACC               |

|                        |                                                                                                               |
|------------------------|---------------------------------------------------------------------------------------------------------------|
| Gib_pEVS79_ES_sypE_rev | gcaggaattcgatatcaagcAATTAAGCTTCCATCTTCAC                                                                      |
| Gib_pEVS79_MB_sypE_for | gaggtcgacggtatcgataaAGTTTCACA ACTCAATACTAATA<br>ATATTC                                                        |
| Gib_pEVS79_MB_sypE_rev | gcaggaattcgatatcaagcTCAACAATTAAGCTTCCATC                                                                      |
| Gib_SR5_syp_DS_for     | gcttattatgATATTTGCTCGAGGACAATAAAAAG                                                                           |
| Gib_SR5_syp_DS_rev     | gcaggaattcgatatcaagcTGGTGAGTG TAGAATCCATTC                                                                    |
| Gib_SR5_syp_US_for     | gaggtcgacggtatcgataaAACCGTAGCGCCAAATGG                                                                        |
| Gib_SR5_syp_US_rev     | gagcaaatatCATAATAAGCTCCTAGGGAATAATCC                                                                          |
| HB8                    | ACAAAATTTTAAGATACTGCACTATCAACACACTCTT<br>AAG                                                                  |
| HB9                    | GGGAGGAAATAATCTAGAATGCGAGAGTAGG                                                                               |
| HB23                   | TTGGAGAGCCAGCTGCGTTCGCTAA                                                                                     |
| HB39                   | TAGGAAGCTTACGAGACGAGCTTCTTATATATGCTT<br>CGCCAGGAAGTTTCTATTCTCTAGAAAGTATAGGAA<br>CTTCCTTAGAAGCAA ACTTAAGAGTGTG |
| HB41                   | CGATCTTGTGGGTAGAGACATCCAGGTCAAGTCCAG<br>CCCCGCTCTAGTTTGGGAATCAAGTGCATGAGCGCT<br>GAAG                          |
| HB42                   | ACGAGACGAGCTTCTTATATATGCTTCGCCAG                                                                              |
| HB146                  | CGATCTTGTGGGTAGAGACATC                                                                                        |
| binK-F1                | GAAATTACCATGGAGCCAACAGCAAGAC                                                                                  |
| binK-R1-LUH            | ctggcgaagcatatataagaagctcgtctcgtCATAAAAAACCTAG<br>CGCTTTATTTGTAGATATAATTATTA ACTATAATCGC                      |

|                  |                                                                              |
|------------------|------------------------------------------------------------------------------|
| binK-F2-RUH      | gacttgacctggatgtctctaccacaagatcgCGCTCATTGTATCT<br>ATAGAGTATGTAAGTACTGAGTTACG |
| binK-R2          | GGCATCATTATGGCAACCATTAAAGACG                                                 |
| binK-FO          | CCGTTAATACTGGATTATTCGCTTGAATTTGAACG                                          |
| KMB_036          | CCACAATAGCAGAATACAAATTCGCTG                                                  |
| KMB_037          | CTCAAATGACAGTCAGAGTATCGTAGGC                                                 |
| JFB_287          | ATGGAGTTTCTACGTCAACCAGAA                                                     |
| JFB_287_MB11B1   | ATGGAGTTTTTACGTCAACCAGAG                                                     |
| JFB_288          | TGTTATAACGATTACATGGCAGCG                                                     |
| JFB_365          | GGAAAGAGAATGATTAAG                                                           |
| M13for           | GTAAAACGACGGCCAG                                                             |
| M13rev           | CAGGAAACAGCTATGAC                                                            |
| MB11B1_indel_for | GCTTTTTTTCAGATACAAAGCCA                                                      |
| MB11B1_indel_rev | ATACCTGATGGAAACGACCT                                                         |
| MJM-154F         | TAAAAAGGGAATTAATCCGC                                                         |
| MJM-306R         | AACTCTAACCAAGAAGCA                                                           |
| pEVS107_3837     | GGCGCGCCTAGGGCCCTC                                                           |
| pEVS107_3838     | TCGAGGTACCTGGCCACTAG                                                         |



|                 |                                                  |
|-----------------|--------------------------------------------------|
| pEVS79_for_691  | GCTTGATATCGAATTCCTG                              |
| pEVS79_rev_690  | TTATCGATACCGTCGACC                               |
| rev_ver_sypE    | TTCACCATGAGTGCCAAATC                             |
| rscS_del1F      | CTTATCTTCTAGTTCTTTTTTTTAGTGATGTCTCTTTC<br>TACGGC |
| rscS_del1R      | GCCGTAGAAAGAGACATCACTAAAAAAAAGAACTAG<br>AAGATAAG |
| rscS_ver_1      | GTAATTCAGTAATGCTACC                              |
| rscS_ver_2      | GTCGCACCGTCAGGTATA                               |
| rscS_ver_3      | AAGAAATTATTCGCTACC                               |
| rscS_ver_4      | AGTTAGTAGGCCATTACG                               |
| SR5_syp_ver_for | TAGGCGTATCAAAAACCCACCT                           |
| SR5_syp_ver_rev | TCAGGAATGTCGATGGCAG                              |
| Syp_ver_DS_rev  | ATCGAGCATATTTTGCCAATC                            |
| Syp_ver_US_for  | ACCTATCAACTCTTAAGTCGATTC                         |
| syp4F           | TGAGGATCCCATCGTGCCATA                            |
| syp4R           | AGCTCCTTTGCAATGTTTGCTT                           |
| syp5F           | TATTAGGCCGTTTCCACCAGG                            |
| syp5F-B         | TATTAGGTCGTTTCCATCAGG                            |

|                  |                      |
|------------------|----------------------|
| sypA_out         | AACAGGAATTGCGTTTTCAA |
| US_syp_flank_for | ACCACTGTGATAACTTGAC  |
| US_syp_flank_rev | ATGAGGCATAACCTGTTCCA |

706 For Gibson assembly primers, capital letters indicate homology to the template. All primers were  
707 designed for this study except MJM-154F, MJM-306R (22); JFB\_287, JFB\_288, and JFB\_365  
708 (18); and M13 for, M13 rev.

709

## 710 **ACKNOWLEDGMENTS**

711

712 The authors thank Elizabeth Bacon, Jacklyn Duple, Cheeneng Moua, Lynn Naughton, Olivia  
713 Sauls, and Denise Tarnowski for assistance with experiments.

714

## 715 **FUNDING INFORMATION**

716

717 This work was funded by NIH grants R35GM119627 (to M.J.M.) and R21AI117262 (M.J.M.) and  
718 NSF grant IOS-1757297 (M.J.M.). Support for trainees was provided on NIGMS grants  
719 T32GM008061 (J.F.B.) and T32GM008349 (K.M.B.). This work was funded by the Chicago  
720 Biomedical Consortium with support from the Searle Funds at The Chicago Community Trust  
721 (supporting E.R.R.).

722

## 723 **REFERENCES**

- 724 1. Long SR. 1996. *Rhizobium* symbiosis: nod factors in perspective. *Plant Cell* 8:1885–1898.
- 725 2. Roche P, Maillet F, Plazanet C, Debelle F, Ferro M, Truchet G, Promé JC, Dénarié J. 1996.

- 726 The common *nodABC* genes of *Rhizobium meliloti* are host-range determinants. Proc Natl  
727 Acad Sci U S A 93:15305–15310.
- 728 3. Costello EK, Lauber CL, Hamady M, Fierer N, Gordon JI, Knight R. 2009. Bacterial  
729 community variation in human body habitats across space and time. Science 326:1694–  
730 1697.
- 731 4. Grice EA, Kong HH, Conlan S, Deming CB, Davis J, Young AC, NISC Comparative  
732 Sequencing Program, Bouffard GG, Blakesley RW, Murray PR, Green ED, Turner ML,  
733 Segre JA. 2009. Topographical and temporal diversity of the human skin microbiome.  
734 Science 324:1190–1192.
- 735 5. Mark Welch JL, Rossetti BJ, Rieken CW, Dewhirst FE, Borisy GG. 2016. Biogeography of a  
736 human oral microbiome at the micron scale. Proc Natl Acad Sci U S A 113:E791–E800.
- 737 6. Ruby EG. 2008. Symbiotic conversations are revealed under genetic interrogation. Nat Rev  
738 Microbiol 6:752–762.
- 739 7. Nyholm SV, McFall-Ngai MJ. 2004. The winnowing: establishing the squid-vibrio symbiosis.  
740 Nat Rev Microbiol 2:632–642.
- 741 8. Visick KL, Ruby EG. 2006. *Vibrio fischeri* and its host: it takes two to tango. Curr Opin  
742 Microbiol 9:632–638.
- 743 9. Mandel MJ, Schaefer AL, Brennan CA, Heath-Heckman EAC, Deloney-Marino CR, McFall-  
744 Ngai MJ, Ruby EG. 2012. Squid-derived chitin oligosaccharides are a chemotactic signal  
745 during colonization by *Vibrio fischeri*. Appl Environ Microbiol 78:4620–4626.
- 746 10. Jones BW, Nishiguchi MK. 2004. Counterillumination in the Hawaiian bobtail squid,  
747 *Euprymna scolopes* Berry (Mollusca: Cephalopoda). Mar Biol 144:1151–1155.

- 748 11. Ruby EG, McFall-Ngai MJ. 1992. A squid that glows in the night: development of an animal-  
749 bacterial mutualism. *J Bacteriol* 174:4865–4870.
- 750 12. Wier AM, Nyholm SV, Mandel MJ, Massengo-Tiassé RP, Schaefer AL, Koroleva I, Splinter-  
751 Bondurant S, Brown B, Manzella L, Snir E, Almabrazi H, Scheetz TE, Bonaldo M de F,  
752 Casavant TL, Soares MB, Cronan JE, Reed JL, Ruby EG, McFall-Ngai MJ. 2010.  
753 Transcriptional patterns in both host and bacterium underlie a daily rhythm of anatomical  
754 and metabolic change in a beneficial symbiosis. *Proc Natl Acad Sci U S A* 107:2259–2264.
- 755 13. Visick KL. 2009. An intricate network of regulators controls biofilm formation and  
756 colonization by *Vibrio fischeri*. *Mol Microbiol* 74:782–789.
- 757 14. Yip ES, Grublesky BT, Husa EA, Visick KL. 2005. A novel, conserved cluster of genes  
758 promotes symbiotic colonization and  $\sigma^{54}$ -dependent biofilm formation by *Vibrio fischeri*. *Mol*  
759 *Microbiol* 57:1485–1498.
- 760 15. Yip ES, Geszvain K, DeLoney-Marino CR, Visick KL. 2006. The symbiosis regulator RscS  
761 controls the *syp* gene locus, biofilm formation and symbiotic aggregation by *Vibrio fischeri*.  
762 *Mol Microbiol* 62:1586–1600.
- 763 16. Shibata S, Yip ES, Quirke KP, Ondrey JM, Visick KL. 2012. Roles of the Structural  
764 Symbiosis Polysaccharide (*syp*) Genes in Host Colonization, Biofilm Formation, and  
765 Polysaccharide Biosynthesis in *Vibrio fischeri*. *J Bacteriol* 194:6736–6747.
- 766 17. Morris AR, Visick KL. 2013. The response regulator SypE controls biofilm formation and  
767 colonization through phosphorylation of the *syp*-encoded regulator SypA in *Vibrio fischeri*.  
768 *Mol Microbiol* 87:509–525.
- 769 18. Brooks JF 2nd, Mandel MJ. 2016. The Histidine Kinase BinK Is a Negative Regulator of  
770 Biofilm Formation and Squid Colonization. *J Bacteriol* 198:2596–2607.

- 771 19. Tischler AH, Lie L, Thompson CM, Visick KL. 2018. Discovery of Calcium as a Biofilm-  
772 Promoting Signal for *Vibrio fischeri* Reveals New Phenotypes and Underlying Regulatory  
773 Complexity. *J Bacteriol* 200:e00016–18.
- 774 20. Pankey MS, Foxall RL, Ster IM, Perry LA, Schuster BM, Donner RA, Coyle M, Cooper VS,  
775 Whistler CA. 2017. Host-selected mutations converging on a global regulator drive an  
776 adaptive leap towards symbiosis in bacteria. *Elife* 6:e24414.
- 777 21. Thompson CM, Tischler AH, Tarnowski DA, Mandel MJ, Visick KL. 2018. Nitric oxide  
778 inhibits biofilm formation by *Vibrio fischeri* via the nitric oxide-sensor HnoX. *Mol Microbiol*  
779 doi:10.1111/mmi.14147.
- 780 22. Mandel MJ, Wollenberg MS, Stabb EV, Visick KL, Ruby EG. 2009. A single regulatory gene  
781 is sufficient to alter bacterial host range. *Nature* 458:215–218.
- 782 23. Nyholm SV, Nishiguchi MK. 2008. The evolutionary ecology of a sepiolid squid-vibrio  
783 association: from cell to environment. *Vie Milieu Paris* 58:175–184.
- 784 24. Fidopiastis PM, von Boletzky S, Ruby EG. 1998. A new niche for *Vibrio logei*, the  
785 predominant light organ symbiont of squids in the genus *Sepioloa*. *J Bacteriol* 180:59–64.
- 786 25. Ruby EG, Lee KH. 1998. The *Vibrio fischeri-Euprymna scolopes* Light Organ Association:  
787 Current Ecological Paradigms. *Appl Environ Microbiol* 64:805–812.
- 788 26. Mandel MJ. 2010. Models and approaches to dissect host-symbiont specificity. *Trends*  
789 *Microbiol* 18:504–511.
- 790 27. Gyllborg MC, Sahl JW, Cronin DC 3rd, Rasko DA, Mandel MJ. 2012. Draft genome  
791 sequence of *Vibrio fischeri* SR5, a strain isolated from the light organ of the Mediterranean  
792 squid *Sepioloa robusta*. *J Bacteriol* 194:1639.

- 793 28. Geszvain K, Visick KL. 2008. Multiple factors contribute to keeping levels of the symbiosis  
794 regulator RscS low. *FEMS Microbiol Lett* 285:33–39.
- 795 29. Wollenberg MS, Ruby EG. 2009. Population structure of *Vibrio fischeri* within the light  
796 organs of *Euprymna scolopes* squid from Two Oahu (Hawaii) populations. *Appl Environ*  
797 *Microbiol* 75:193–202.
- 798 30. Wollenberg MS, Ruby EG. 2012. Phylogeny and fitness of *Vibrio fischeri* from the light  
799 organs of *Euprymna scolopes* in two Oahu, Hawaii populations. *ISME J* 6:352–362.
- 800 31. Elliott KT, DiRita VJ. 2008. Characterization of CetA and CetB, a bipartite energy taxis  
801 system in *Campylobacter jejuni*. *Mol Microbiol* 69:1091–1103.
- 802 32. Antonov I, Coakley A, Atkins JF, Baranov PV, Borodovsky M. 2013. Identification of the  
803 nature of reading frame transitions observed in prokaryotic genomes. *Nucleic Acids Res*  
804 41:6514–6530.
- 805 33. Bongrand C, Koch EJ, Moriano-Gutierrez S, Cordero OX, McFall-Ngai M, Polz MF, Ruby  
806 EG. 2016. A genomic comparison of 13 symbiotic *Vibrio fischeri* isolates from the  
807 perspective of their host source and colonization behavior. *ISME J* 10:2907–2917.
- 808 34. Altschul SF, Madden TL, Schäffer AA, Zhang J, Zhang Z, Miller W, Lipman DJ. 1997.  
809 Gapped BLAST and PSI-BLAST: a new generation of protein database search programs.  
810 *Nucleic Acids Res* 25:3389–3402.
- 811 35. Rusch DB, Rowe-Magnus DA. 2017. Complete Genome Sequence of the Pathogenic  
812 *Vibrio vulnificus* Type Strain ATCC 27562. *Genome Announc* 5:e00907–17.
- 813 36. Morris AR, Darnell CL, Visick KL. 2011. Inactivation of a novel response regulator is  
814 necessary for biofilm formation and host colonization by *Vibrio fischeri*. *Mol Microbiol*

- 815 82:114–130.
- 816 37. Guo Y, Rowe-Magnus DA. 2011. Overlapping and unique contributions of two conserved  
817 polysaccharide loci in governing distinct survival phenotypes in *Vibrio vulnificus*. *Environ*  
818 *Microbiol* 13:2888–2990.
- 819 38. Morris AR, Visick KL. 2013. Inhibition of SypG-induced biofilms and host colonization by the  
820 negative regulator SypE in *Vibrio fischeri*. *PLoS One* 8:e60076.
- 821 39. Husa EA, Darnell CL, Visick KL. 2008. RscS functions upstream of SypG to control the  
822 *syp* locus and biofilm formation in *Vibrio fischeri*. *J Bacteriol* 190:4576–4583.
- 823 40. Koehler S, Gaedeke R, Thompson C, Bongrand C, Visick KL, Ruby E, McFall-Ngai M.  
824 2018. The model squid-vibrio symbiosis provides a window into the impact of strain- and  
825 species-level differences during the initial stages of symbiont engagement. *Environ*  
826 *Microbiol* doi:10.1111/1462–2920.14392.
- 827 41. Ray VA, Visick KL. 2012. LuxU connects quorum sensing to biofilm formation in *Vibrio*  
828 *fischeri*. *Mol Microbiol* 86:954–970.
- 829 42. Giraud E, Moulin L, Vallenet D, Barbe V, Cytryn E, Avarre J-C, Jaubert M, Simon D,  
830 Cartieaux F, Prin Y, Bena G, Hannibal L, Fardoux J, Kojadinovic M, Vuillet L, Lajus A,  
831 Cruveiller S, Rouy Z, Mangenot S, Segurens B, Dossat C, Franck WL, Chang W-S,  
832 Saunders E, Bruce D, Richardson P, Normand P, Dreyfus B, Pignol D, Stacey G, Emerich  
833 D, Verméglio A, Médigue C, Sadowsky M. 2007. Legumes symbioses: absence of Nod  
834 genes in photosynthetic bradyrhizobia. *Science* 316:1307–1312.
- 835 43. Bonaldi K, Gargani D, Prin Y, Fardoux J, Gully D, Nouwen N, Goormachtig S, Giraud E.  
836 2011. Nodulation of *Aeschynomene afraspera* and *A. indica* by photosynthetic  
837 *Bradyrhizobium* Sp. strain ORS285: the Nod-dependent versus the Nod-independent

- 838 symbiotic interaction. *Mol Plant Microbe Interact* 24:1359–1371.
- 839 44. Darriba D, Taboada GL, Doallo R, Posada D. 2012. jModelTest 2: more models, new  
840 heuristics and parallel computing. *Nat Methods* 9:772.
- 841 45. Swofford DL. 2003. PAUP\*: Phylogenetic Analysis Using Parsimony (\* and Other Methods)  
842 4th edn. Sinauer.
- 843 46. Ronquist F, Teslenko M, van der Mark P, Ayres DL, Darling A, Höhna S, Larget B, Liu L,  
844 Suchard MA, Huelsenbeck JP. 2012. MrBayes 3.2: efficient Bayesian phylogenetic  
845 inference and model choice across a large model space. *Syst Biol* 61:539–542.
- 846 47. Ronquist F, van der Mark P, Huelsenbeck JP. 2009. Bayesian phylogenetic analysis using  
847 MrBayes, 2nd edn. Cambridge University Press.
- 848 48. Visick KL, Hodge-Hanson KM, Tischler AH, Bennett AK, Mastrodomenico V. 2018. Tools  
849 for Rapid Genetic Engineering of *Vibrio fischeri*. *Appl Environ Microbiol* 84:e00850–18.
- 850 49. Pollack-Berti A, Wollenberg MS, Ruby EG. 2010. Natural transformation of *Vibrio fischeri*  
851 requires *tfoX* and *tfoY*. *Environ Microbiol* 12:2302–2311.
- 852 50. Baba T, Ara T, Hasegawa M, Takai Y, Okumura Y, Baba M, Datsenko KA, Tomita M,  
853 Wanner BL, Mori H. 2006. Construction of *Escherichia coli* K-12 in-frame, single-gene  
854 knockout mutants: the Keio collection. *Mol Syst Biol* 2:2006.0008.
- 855 51. Naughton LM, Mandel MJ. 2012. Colonization of *Euprymna scolopes* squid by *Vibrio*  
856 *fischeri*. *J Vis Exp* e3758.
- 857 52. Finn RD, Coggill P, Eberhardt RY, Eddy SR, Mistry J, Mitchell AL, Potter SC, Punta M,  
858 Qureshi M, Sangrador-Vegas A, Salazar GA, Tate J, Bateman A. 2016. The Pfam protein  
859 families database: towards a more sustainable future. *Nucleic Acids Res* 44:D279–85.



- 860 53. Lee K-H. 1994. Ecology of *Vibrio fischeri*: the light organ symbiont of the Hawaiian sepiolid  
861 squid *Euprymna scolopes*. University of Southern California.
- 862 54. Boettcher KJ, Ruby EG. 1990. Depressed light emission by symbiotic *Vibrio fischeri* of the  
863 sepiolid squid *Euprymna scolopes*. J Bacteriol 172:3701–3706.
- 864 55. Boettcher KJ, Ruby EG. 1994. Occurrence of plasmid DNA in the sepiolid squid symbiont  
865 *Vibrio fischeri*. Curr Microbiol 29:279–286.
- 866 56. Nishiguchi MK, Ruby EG, McFall-Ngai MJ. 1998. Competitive dominance among strains of  
867 luminous bacteria provides an unusual form of evidence for parallel evolution in Sepiolid  
868 squid-vibrio symbioses. Appl Environ Microbiol 64:3209–3213.
- 869 57. Nishiguchi MK, Nair VS. 2003. Evolution of symbiosis in the Vibrionaceae: a combined  
870 approach using molecules and physiology. Int J Syst Evol Microbiol 53:2019–2026.
- 871 58. Stabb EV, Ruby EG. 2002. RP4-based plasmids for conjugation between *Escherichia coli*  
872 and members of the *Vibrionaceae*. Methods Enzymol 358:413–426.
- 873 59. Dunn AK, Millikan DS, Adin DM, Bose JL, Stabb EV. 2006. New *rfp*- and pES213-derived  
874 tools for analyzing symbiotic *Vibrio fischeri* reveal patterns of infection and *lux* expression in  
875 situ. Appl Environ Microbiol 72:802–810.
- 876 60. Visick KL, Skoufos LM. 2001. Two-component sensor required for normal symbiotic  
877 colonization of *Euprymna scolopes* by *Vibrio fischeri*. J Bacteriol 183:835–842.
- 878 61. McCann J, Stabb EV, Millikan DS, Ruby EG. 2003. Population dynamics of *Vibrio fischeri*  
879 during infection of *Euprymna scolopes*. Appl Environ Microbiol 69:5928–5934.

880

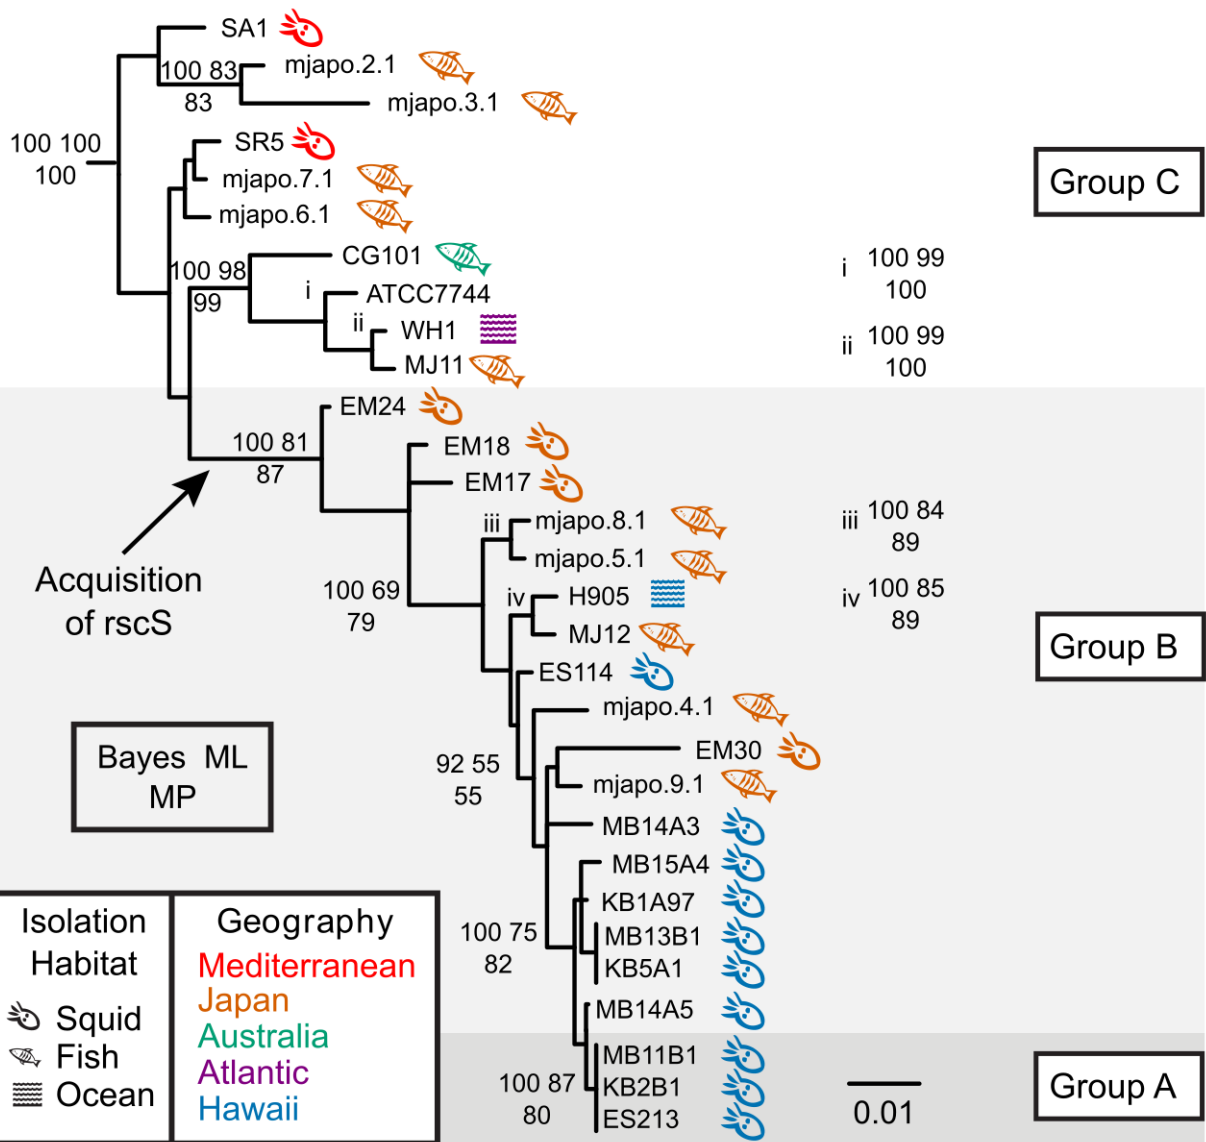

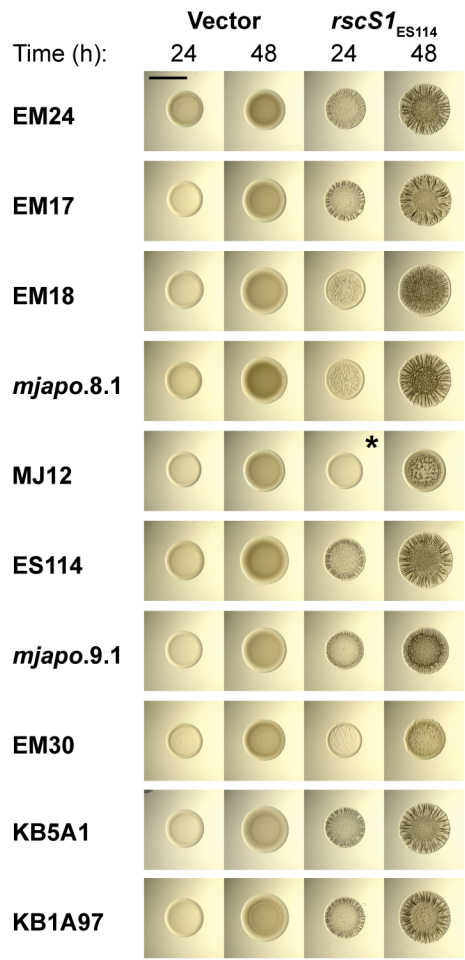

Group B

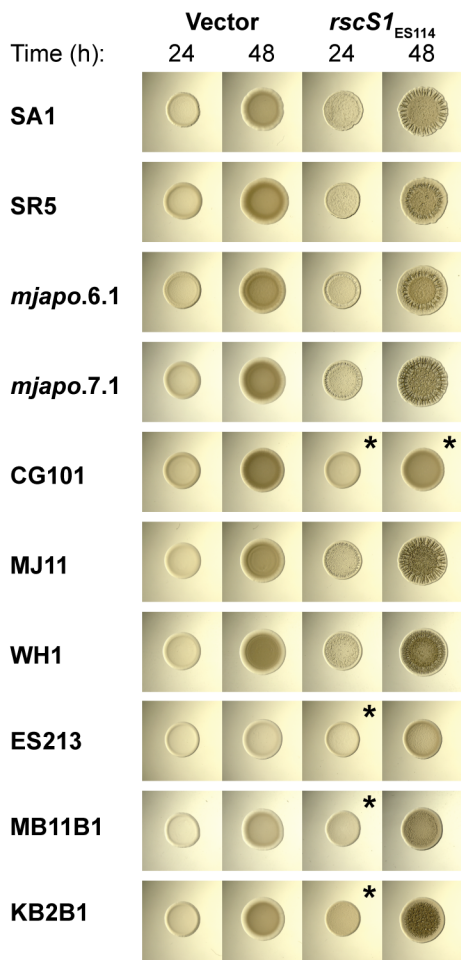

Group C

Group A

Log<sub>10</sub> CFU/O

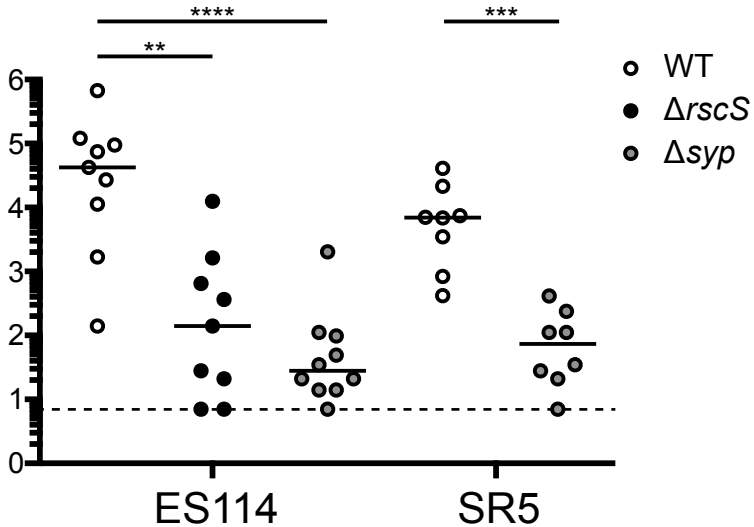

**A**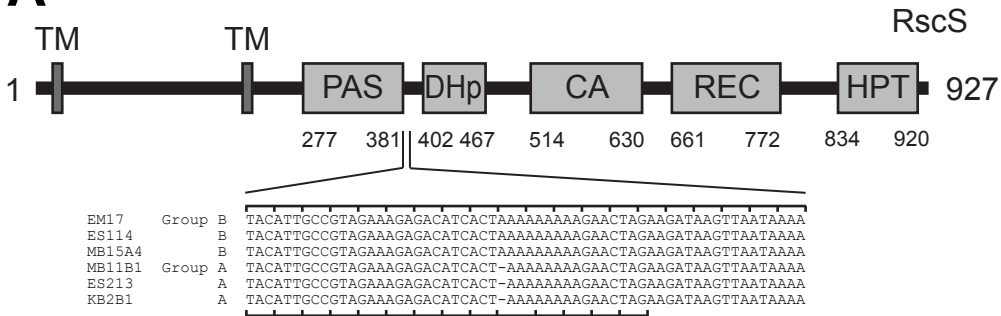**B**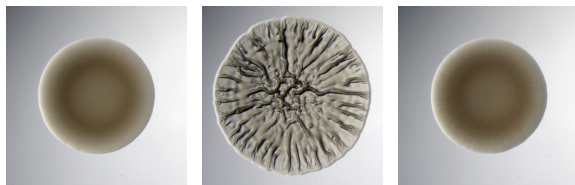

Vector

*rscS1**rscS1<sup>FS</sup>*

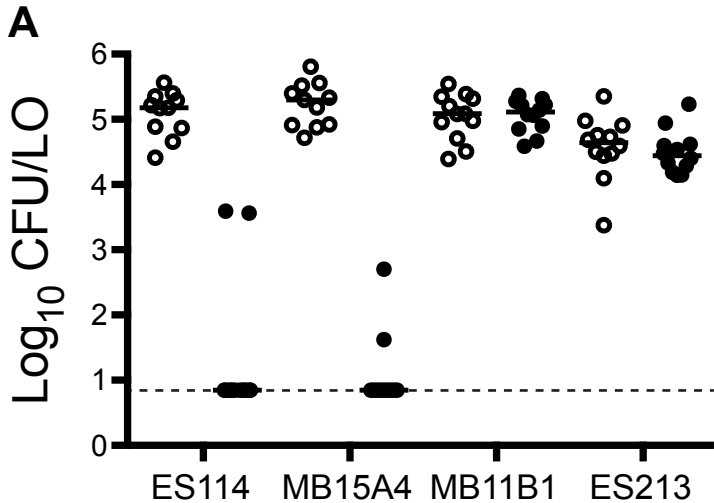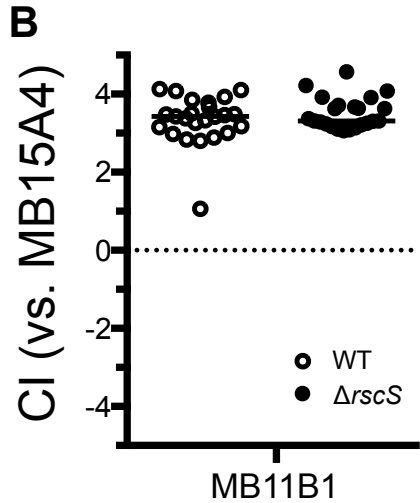

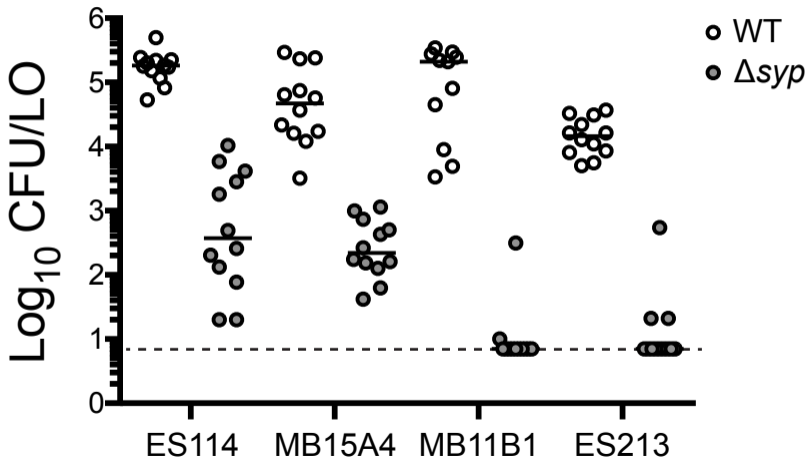

**A**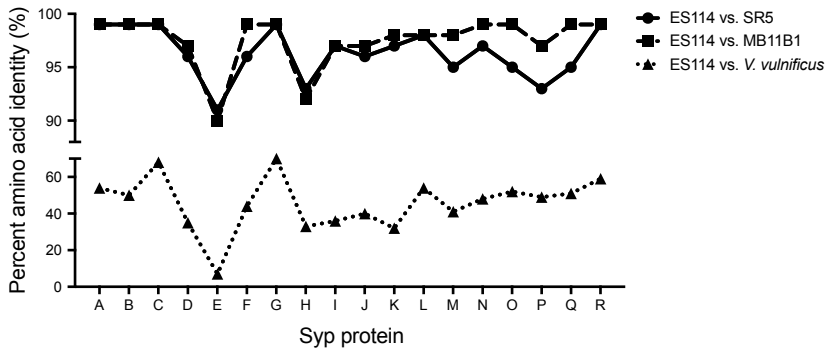**B**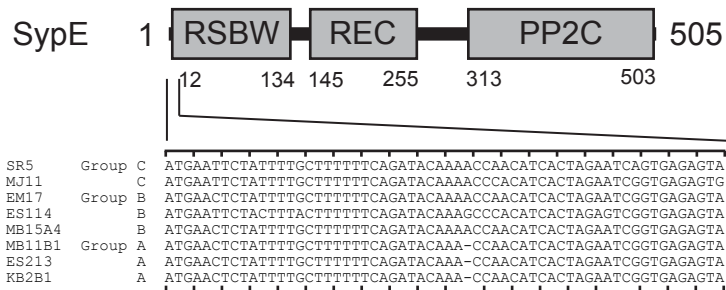



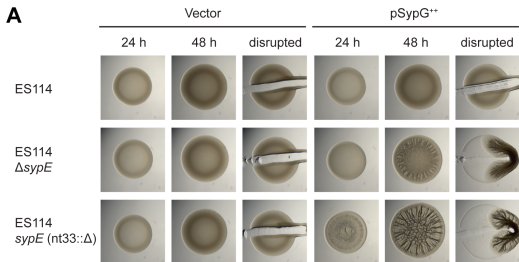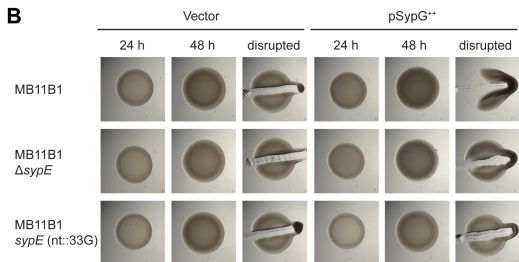

Log<sub>10</sub> CFU/LO

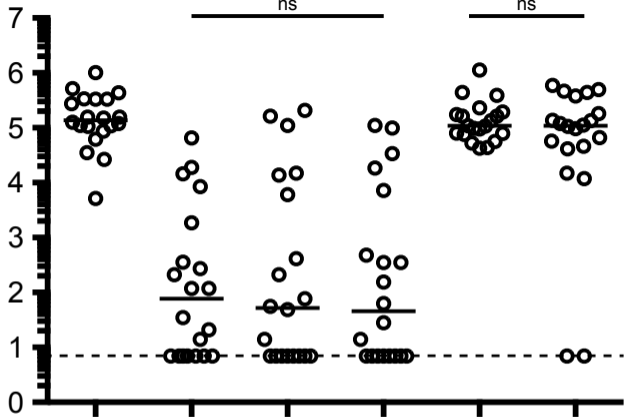

|               |   |   |   |    |    |     |
|---------------|---|---|---|----|----|-----|
| <i>rscS</i> : | + | Δ | Δ | Δ  | fs | fs  |
| <i>sypE</i> : | + | + | Δ | fs | fs | (+) |

ES114

MB11B1

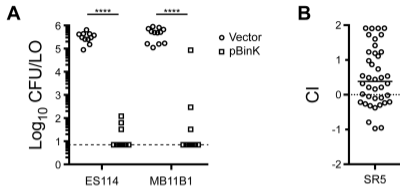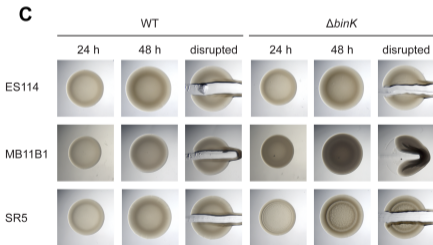

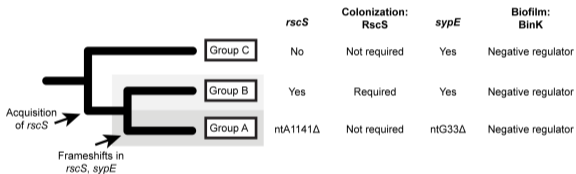

Table S1. Primers pairs for construction of mutants.

| Strain                                                                                                 | Note | Forward Primer                                                                               | Reverse Primer                                                                               | PCR Product Size                       | Description of PCR product                                                                                                                                                                                                                                                                                                                    | E. coli with clone                             |
|--------------------------------------------------------------------------------------------------------|------|----------------------------------------------------------------------------------------------|----------------------------------------------------------------------------------------------|----------------------------------------|-----------------------------------------------------------------------------------------------------------------------------------------------------------------------------------------------------------------------------------------------------------------------------------------------------------------------------------------------|------------------------------------------------|
| <b>MJM3010 =</b><br><b>MJM1100 <i>ΔrscS</i> and</b><br><b>MJM3394 =</b><br><b>MJM3354 <i>ΔrscS</i></b> |      | Gib_ES114_rscS_US_for<br>Gib_ES114_rscS_DS_for<br>ES114_US_ver<br>ES114_US_ver               | Gib_ES114_rscS_US_rev<br>Gib_ES114_rscS_DS_rev<br>ES114_DS_ver<br>DAT015F                    | 1.6 kb<br>1.6 kb<br>586 bp<br>520 bp   | Gibson assembly cloning of upstream <i>rscS</i> region in MJM1100 into pEVs79<br>Gibson assembly cloning of downstream <i>rscS</i> region in MJM1100 into pEVs79<br>Verification of <i>ΔrscS</i> by flanking the upstream/downstream junction<br>Verification of <i>ΔrscS</i> ; no product due to one primer binding within <i>rscS</i> .     | <b>MJM3008</b>                                 |
| <b>MJM3017 =</b><br><b>MJM1117 <i>ΔrscS</i></b>                                                        |      | Gib_ES114_rscS_US_for<br>Gib_ES114_rscS_DS_for<br>ES114_US_ver<br>ES114_US_ver               | Gib_ES213_rscS_US_rev<br>Gib_ES114_rscS_DS_rev<br>ES114_DS_ver<br>DAT015F                    | 1.6 kb<br>1.6 kb<br>586 bp<br>520 bp   | Gibson assembly cloning of upstream <i>rscS</i> region in MJM1117 into pEVs79<br>Gibson assembly cloning of downstream <i>rscS</i> region in MJM1117 into pEVs79<br>Verification of <i>ΔrscS</i> by flanking the upstream/downstream junction<br>Verification of <i>ΔrscS</i> ; no product due to one primer binding within <i>rscS</i> .     | <b>MJM3014</b>                                 |
| <b>MJM3046 =</b><br><b>MJM1130 <i>ΔrscS</i></b>                                                        |      | Gib_ES114_rscS_US_for<br>Gib_ES114_rscS_DS_for<br>ES114_US_ver<br>ES114_US_ver               | Gib_ES114_rscS_US_rev<br>Gib_ES114_rscS_DS_rev<br>ES114_DS_ver<br>DAT015F                    | 1.6 kb<br>1.6 kb<br>586 bp<br>520 bp   | Gibson assembly cloning of upstream <i>rscS</i> region in MJM1130 into pEVs79<br>Gibson assembly cloning of downstream <i>rscS</i> region in MJM1130 into pEVs79<br>Verification of <i>ΔrscS</i> by flanking the upstream/downstream junction<br>Verification of <i>ΔrscS</i> ; no product due to one primer binding within <i>rscS</i> .     | <b>MJM3043</b>                                 |
| <b>MJM3042 =</b><br><b>MJM2114 <i>ΔrscS</i></b>                                                        |      | Gib_ES114_rscS_US_for<br>Gib_ES114_rscS_DS_for<br>ES114_US_ver<br>ES114_US_ver               | Gib_ES114_rscS_US_rev<br>Gib_ES114_rscS_DS_rev<br>ES114_DS_ver<br>DAT015F                    | 1.6 kb<br>1.6 kb<br>586 bp<br>520 bp   | Gibson assembly cloning of upstream <i>rscS</i> region in MJM2114 into pEVs79<br>Gibson assembly cloning of downstream <i>rscS</i> region in MJM2114 into pEVs79<br>Verification of <i>ΔrscS</i> by flanking the upstream/downstream junction<br>Verification of <i>ΔrscS</i> ; no product due to one primer binding within <i>rscS</i> .     | <b>MJM3039</b>                                 |
| <b>MJM3062 =</b><br><b>MJM1100 <i>ΔsypA-R</i></b>                                                      |      | Gib_ES114_syp_US_for<br>Gib_ES114_syp_DS_for<br>Syp_ver_US_for<br>Syp_ver_US_for             | Gib_ES114_syp_US_rev<br>Gib_ES114_syp_DS_rev<br>Syp_ver_DS_rev<br>sypA_out                   | 1.6 kb<br>1.6 kb<br>503 bp<br>490 bp   | Gibson assembly cloning of upstream <i>sypA</i> region in MJM1100 into pEVs79<br>Gibson assembly cloning of downstream <i>sypR</i> region in MJM1100 into pEVs79<br>Verification of <i>ΔsypA-R</i> by flanking the upstream/downstream junction<br>Verification of <i>ΔsypA-R</i> ; no product due to one primer binding within <i>sypA</i> . | <b>MJM3060</b>                                 |
| <b>MJM3068 =</b><br><b>MJM1117 <i>ΔsypA-R</i></b>                                                      |      | Gib_ES114_syp_US_for<br>Gib_MB11B1_syp_DS_for<br>Syp_ver_US_for<br>Syp_ver_US_for            | Gib_ES114_syp_US_rev<br>Gib_ES114_syp_DS_rev<br>Syp_ver_DS_rev<br>sypA_out                   | 1.6 kb<br>1.6 kb<br>503 bp<br>490 bp   | Gibson assembly cloning of upstream <i>sypA</i> region in MJM1117 into pEVs79<br>Gibson assembly cloning of downstream <i>sypR</i> region in MJM1117 into pEVs79<br>Verification of <i>ΔsypA-R</i> by flanking the upstream/downstream junction<br>Verification of <i>ΔsypA-R</i> ; no product due to one primer binding within <i>sypA</i> . | <b>MJM3066</b>                                 |
| <b>MJM3501 =</b><br><b>MJM1125 <i>ΔsypA-R</i></b>                                                      |      | Gib_SR5_syp_US_for<br>Gib_SR5_syp_DS_for<br>SR5_syp_ver_for<br>Gib_SR5_syp_US_for            | Gib_SR5_syp_US_rev<br>Gib_SR5_syp_DS_rev<br>SR5_syp_ver_rev<br>sypA_out                      | 1.6 kb<br>1.6 kb<br>506 bp<br>1.9 kb   | Gibson assembly cloning of upstream <i>sypA</i> region in MJM1125 into pEVs79<br>Gibson assembly cloning of downstream <i>sypR</i> region in MJM1125 into pEVs79<br>Verification of <i>ΔsypA-R</i> by flanking the upstream/downstream junction<br>Verification of <i>ΔsypA-R</i> ; no product due to one primer binding within <i>sypA</i> . | <b>MJM3500</b>                                 |
| <b>MJM3065 =</b><br><b>MJM1130 <i>ΔsypA-R</i></b>                                                      |      | Gib_MB11B1_syp_US_for<br>Gib_MB11B1_syp_DS_for<br>Syp_ver_US_for<br>Syp_ver_US_for           | Gib_MB11B1_syp_US_rev<br>Gib_ES114_syp_DS_rev<br>Syp_ver_DS_rev<br>sypA_out                  | 1.6 kb<br>1.6 kb<br>503 bp<br>490 bp   | Gibson assembly cloning of upstream <i>sypA</i> region in MJM1130 into pEVs79<br>Gibson assembly cloning of downstream <i>sypR</i> region in MJM1130 into pEVs79<br>Verification of <i>ΔsypA-R</i> by flanking the upstream/downstream junction<br>Verification of <i>ΔsypA-R</i> ; no product due to one primer binding within <i>sypA</i> . | <b>MJM3063</b>                                 |
| <b>MJM3071 =</b><br><b>MJM2114 <i>ΔsypA-R</i></b>                                                      |      | Gib_ES114_syp_US_for<br>Gib_ES114_syp_DS_for<br>Syp_ver_US_for<br>Syp_ver_US_for             | Gib_ES114_syp_US_rev<br>Gib_ES114_syp_DS_rev<br>Syp_ver_DS_rev<br>sypA_out                   | 1.6 kb<br>1.6 kb<br>503 bp<br>490 bp   | Gibson assembly cloning of upstream <i>sypA</i> region in MJM2114 into pEVs79<br>Gibson assembly cloning of downstream <i>sypR</i> region in MJM2114 into pEVs79<br>Verification of <i>ΔsypA-R</i> by flanking the upstream/downstream junction<br>Verification of <i>ΔsypA-R</i> ; no product due to one primer binding within <i>sypA</i> . | <b>MJM3069</b>                                 |
| <b>MJM3084 =</b><br><b>MJM1130 <i>ΔbinK</i></b>                                                        |      | Gib_ES114_binK_US_for<br>Gib_ES114_binK_DS_for<br>JFB_287_MB11B1<br>JFB_287_MB11B1           | Gib_ES114_binK_US_rev<br>Gib_ES114_binK_DS_rev<br>JFB_288<br>JFB_365                         | 1.6 kb<br>1.6 kb<br>767 bp<br>624 bp   | Gibson assembly cloning of upstream <i>binK</i> region in MJM1130 into pEVs79<br>Gibson assembly cloning of downstream <i>binK</i> region in MJM1130 into pEVs79<br>Verification of <i>ΔbinK</i> by flanking the upstream/downstream junction<br>Verification of <i>ΔbinK</i> ; no product due to one primer binding within <i>binK</i> .     | <b>MJM3082</b>                                 |
| <b>MJM3417 =</b><br><b>MJM1100 <i>ΔsypE</i> and</b><br><b>MJM3423 =</b><br><b>MJM3010 <i>ΔsypE</i></b> |      | Gib_ES114_sypE_US_for<br>Gib_ES114_sypE_DS_for<br>syp4F<br>syp5F                             | Gib_ES114_sypE_US_rev<br>Gib_ES114_sypE_DS_rev<br>syp4R<br>syp4R                             | 1.6 kb<br>1.6 kb<br>780 bp<br>772 bp   | Gibson assembly cloning of upstream <i>sypE</i> region in MJM1100 into pEVs79<br>Gibson assembly cloning of downstream <i>sypE</i> region in MJM1100 into pEVs79<br>Verification of <i>ΔsypE</i> by flanking the upstream/downstream junction<br>Verification of <i>ΔsypE</i> ; no product due to one primer binding within <i>sypE</i> .     | <b>MJM3416</b>                                 |
| <b>MJM3410 =</b><br><b>MJM1130 <i>ΔsypE</i></b>                                                        |      | Gib_MB11B1_sypE_US_for<br>Gib_MB11B1_sypE_DS_for<br>for_ver_sypE<br>MB11B1_indel_for         | Gib_MB11B1_sypE_US_rev<br>Gib_MB11B1_sypE_DS_rev<br>rev_ver_sypE<br>MB11B1_indel_rev         | 1.6 kb<br>1.6 kb<br>732 bp<br>779 bp   | Gibson assembly cloning of upstream <i>sypE</i> region in MJM1130 into pEVs79<br>Gibson assembly cloning of downstream <i>sypE</i> region in MJM1130 into pEVs79<br>Verification of <i>ΔsypE</i> by flanking the upstream/downstream junction<br>Verification of <i>ΔsypE</i> ; no product due to both primers binding within <i>sypE</i> .   | <b>MJM3409</b>                                 |
| <b>MJM3354 =</b><br><b>MJM1100 <i>sypE</i>(ntG33Δ)</b>                                                 |      | Gib_ES114_sypE_N_for<br>Gib_ES114_sypE_C_for<br>Gib_pEVs79_ES_sypE_for<br>ES114_indel_for    | Gib_ES114_sypE_N_rev<br>Gib_ES114_sypE_C_rev<br>Gib_pEVs79_ES_sypE_rev<br>ES114_indel_rev    | 332 bp<br>1786 bp<br>2118 bp<br>802 bp | Gibson assembly cloning of N-terminal <i>sypE</i> in MJM1100 into pEVs107<br>Gibson assembly cloning of C-terminal <i>sypE</i> in MJM1100 into pEVs107<br>Gibson assembly cloning of <i>sypE</i> (ntG33Δ) into pEVs79<br>Verification of <i>sypE</i> (ntG33Δ); stronger band with original allele.                                            | <b>MJM3340</b><br><b>and</b><br><b>MJM3352</b> |
| <b>MJM3397 =</b><br><b>MJM1130 <i>sypE</i>(nt33::G)</b>                                                |      | Gib_MB11B1_sypE_N_for<br>Gib_MB11B1_sypE_C_for<br>Gib_pEVs79_MB_sypE_for<br>MB11B1_indel_for | Gib_MB11B1_sypE_N_rev<br>Gib_MB11B1_sypE_C_rev<br>Gib_pEVs79_MB_sypE_rev<br>MB11B1_indel_rev | 332 bp<br>1786 bp<br>2118 bp<br>779 bp | Gibson assembly cloning of N-terminal <i>sypE</i> in MJM1130 into pEVs107<br>Gibson assembly cloning of C-terminal <i>sypE</i> in MJM1130 into pEVs107<br>Gibson assembly cloning <i>sypE</i> (nt33::G) into pEVs79<br>Verification of <i>sypE</i> (nt33::G); stronger band with corrected allele.                                            | <b>MJM3338</b><br><b>and</b><br><b>MJM3351</b> |

>gBlock\_erm

```
GGTCAGCCTCTAATGGCTCGTAAGATAGTGTAGGAAGCTTTATCGAACTGCGCGAAAGATCCCGAAGTTCCTATTCTCT
AGAAAGTATAGGAACTTCCTTAGAAGCAAACCTAAGAGTGTGTTGATAGTGCAGTATCTTAAAATTTTGTATAATAGGA
ATTGAAGTTAAATTAGATGCTAAAAATTTGTAATTAAGAAGGAGTGATTACATGAACAAAAATATAAAATATTCTCAA
ACTTTTTAACGAGTGAAAAAGTACTCAACCAAATAATAAAACAATTGAATTTAAAAGAAACCGATACCGTTTACGAAAT
TGGAACAGGTAAAGGGCATTAAACGACGAAACTGGCTAAAATAAGTAAACAGGTAACGTCTATTGAATTAGACAGTCAT
CTATTCAACTTATCGTCAGAAAAATTA AAACTGAATACTCGTGTCACTTTAATTCACCAAGATATTCTACAGTTTCAAT
TCCCTAACAAACAGAGGTATAAAATTTGTTGGGAGTATTCCTTACCATTTAAGCACACAAATTTATTA AAAAGTGGTTTT
TGAAAGCCATGCGTCTGACATCTATCTGATTGTTGAAGAAGGATTCTACAAGCGTACCTTGGATATTCACCGAACACTA
GGTTTGCTCTTGACACTCAAGTCTCGATTTCAGCAATTGCTTAAGCTGCCAGCGGAATGCTTTCATCCTAAACAAAAG
TAAACAGTGTCTTAATAAAAACCTACCCGCCATACCACAGATGTTCCAGATAAATATTGGAAGCTATATACGTACTTTGT
TTCAAATGGGTCAATCGAGAATATCGTCAACTGTTTACTAAAAATCAGTTTCATCAAGCAATGAAACACGCCAAAGTA
AACAAATTTAAGTACCGTTACTTATGAGCAAGTATTGTCTATTTTTAATAGTTATCTATTATTTAACGGGAGGAAATAAT
CTAGAATGCGAGAGTAGGGAAGTCCGAAGTTCCTATTCTCTAGAAAGTATAGGAACTTCAGCGCTCATGCACTTGATT
CCGGATCCCTAATTAGCGAACGCAGCTGGCTCTCCAA
```
